# Supplementary material for: Burden of hypertensive heart disease attributed to metabolic factors from 1990 to 2021 at global, regional, and national levels: an analysis of the global burden of disease study 2021
Source: Front Cardiovasc Med. 2025 May 29;12:1572392. doi: 10.3389/fcvm.2025.1572392 (PMC12158952; doi:10.3389/fcvm.2025.1572392)
Supplement: Supplementary file 2 [file Table1.xlsx]

## Sheet: Supplementary Table 1
Deaths and disability-adjusted life years (DALYs) due to metabolic factors-induced hypertensive heart disease across 21 regions and 5 sociodemographic index (SDI) regions from 1990 to 2021.
	High systolic blood pressure						High body-mass index
Location		1990		2021		1990-2021	1990		2021		1990-2021
East Asia		Number (95% UI)	ASR, per 100,000 (95% UI)	Number (95% UI)	ASR, per 100,000 (95% UI)	EAPC(95% CI)	Number (95% UI)	ASR, per 100,000 (95% UI)	Number (95% UI)	ASR, per 100,000 (95% UI)	EAPC(95% CI)
	DALYs	5093522.90(3388885.05,6043545.32)	704.60(486.09,825.58)	5815785.04(4183000.54,7412101.31)	292.59(208.13,372.63)	-2.90(-3.30,-2.50)	1430315.98(849322.77,1974447.46)	180.32(105.12,256.67)	2468556.03(1553649.60,3558544.21)	120.29(72.71,178.97)	-1.38(-1.83,-0.94)
	Deaths	238347.03(160707.01,281861.98)	41.85(30.16,48.52)	340459.47(235390.26,437522.23)	18.73(12.94,24.07)	-2.63(-3.01,-2.25)	60550.14(35296.97,84646.36)	9.53(4.68,14.49)	129830.87(67188.11,204255.03)	6.89(3.18,11.52)	-1.11(-1.54,-0.67)
Southeast Asia
	DALYs	1513907.48(1049312.03,1853912.16)	611.27(425.90,742.26)	2961506.47(2121079.47,3445117.39)	464.92(337.72,537.26)	-0.89(-0.93,-0.85)	388645.99(235386.38,525913.28)	141.20(86.26,193.98)	1159652.77(809395.36,1490325.64)	168.45(118.20,217.74)	0.61(0.55,0.68)
	Deaths	62252.71(43313.59,75509.62)	29.56(20.72,35.80)	128558.18(93285.80,148505.10)	22.92(16.77,26.44)	-0.82(-0.86,-0.77)	13601.52(8334.27,18952.33)	5.70(3.36,8.20)	43047.89(29946.18,57024.25)	6.97(4.62,9.60)	0.69(0.63,0.75)
Oceania
	DALYs	17823.27(11002.21,24803.56)	583.52(372.62,788.90)	35062.04(23160.73,50999.76)	434.39(296.36,624.04)	-1.02(-1.08,-0.97)	9811.60(6241.49,13921.72)	290.91(188.24,402.99)	21672.67(14663.88,31793.88)	243.69(171.23,353.90)	-0.65(-0.69,-0.60)
	Deaths	615.04(386.86,835.17)	26.10(17.33,34.35)	1215.15(822.87,1748.15)	18.96(13.07,26.76)	-1.12(-1.17,-1.06)	311.09(201.38,434.00)	11.36(7.24,16.17)	683.33(479.26,995.54)	9.27(6.25,13.18)	-0.75(-0.81,-0.69)
Central Asia
	DALYs	147712.51(129909.12,166754.01)	323.91(283.77,369.01)	283308.21(241248.01,334815.87)	376.07(321.40,442.63)	0.67(0.05,1.29)	85508.33(68291.76,103807.29)	182.97(142.27,227.00)	177446.17(135756.18,223717.46)	225.17(167.21,286.40)	0.73(0.09,1.39)
	Deaths	6686.63(5813.50,7785.03)	16.04(13.80,18.86)	13573.68(11636.00,15961.54)	20.61(17.78,23.95)	1.31(0.69,1.92)	3545.14(2503.49,4646.46)	8.24(5.49,11.12)	7827.01(5328.64,10300.67)	11.36(7.06,15.74)	1.39(0.75,2.04)
Central Europe
	DALYs	591292.71(565902.90,618593.00)	413.06(394.15,432.51)	956634.24(868696.73,1034182.64)	418.07(380.31,452.32)	0.56(0.31,0.81)	341700.58(266977.42,420819.55)	234.60(179.04,292.21)	576781.04(392430.95,742465.81)	256.77(182.69,324.76)	0.79(0.54,1.05)
	Deaths	31126.68(29540.94,32639.54)	23.29(21.91,24.55)	60796.63(54806.79,65392.89)	25.38(22.88,27.33)	0.84(0.58,1.11)	16693.47(11459.20,22125.11)	12.18(7.52,16.66)	34417.02(18115.28,47345.50)	14.52(7.94,19.75)	1.11(0.84,1.38)
Eastern Europe
	DALYs	278124.96(263537.01,292092.68)	101.61(96.09,106.72)	486144.09(445288.74,531613.46)	139.74(127.98,152.98)	0.86(-0.10,1.82)	168680.46(139916.63,195265.10)	61.10(50.73,70.84)	312735.83(239269.96,385023.67)	90.73(71.47,110.51)	1.05(0.08,2.03)
	Deaths	11684.52(11085.69,12239.65)	4.48(4.23,4.70)	26345.62(23718.89,28592.12)	7.41(6.68,8.04)	1.71(0.78,2.66)	6651.82(5127.37,8085.90)	2.50(1.86,3.13)	15863.48(10102.08,21119.53)	4.49(2.96,5.91)	1.92(0.96,2.89)
High-income Asia Pacific
	DALYs	285935.85(254889.26,304429.16)	159.11(141.31,169.99)	271493.27(220905.07,316418.98)	47.13(40.15,56.24)	-3.63(-4.33,-2.92)	87924.58(58623.82,119644.79)	47.35(29.06,66.74)	93541.29(44902.92,149938.14)	18.25(11.86,25.80)	-2.84(-3.54,-2.13)
	Deaths	17173.74(15015.75,18491.90)	10.53(9.01,11.40)	21389.52(16124.15,25079.27)	2.97(2.33,3.47)	-3.66(-4.41,-2.89)	4662.16(2307.05,7153.79)	2.77(1.18,4.44)	6724.26(2088.28,11979.23)	1.00(0.42,1.66)	-2.93(-3.70,-2.16)
Australasia
	DALYs	12662.18(11696.84,13313.21)	56.25(51.71,59.32)	22280.12(19507.90,24359.74)	38.75(34.53,42.00)	-1.07(-1.52,-0.62)	6699.00(4801.36,8677.48)	29.57(20.80,38.89)	13456.65(8333.83,17817.71)	24.32(16.24,31.00)	-0.52(-0.97,-0.07)
	Deaths	742.17(666.99,789.26)	3.45(3.05,3.70)	1506.05(1245.05,1664.59)	2.35(1.97,2.59)	-1.04(-1.46,-0.63)	355.76(203.69,508.89)	1.63(0.85,2.38)	837.91(336.60,1223.84)	1.34(0.62,1.90)	-0.47(-0.88,-0.05)
Western Europe
	DALYs	800491.36(738004.55,839368.19)	134.85(124.38,141.28)	1300940.56(1085908.47,1427459.35)	111.09(94.93,120.81)	-0.05(-0.22,0.12)	390360.29(248712.07,526127.88)	66.72(44.26,88.38)	667213.83(285608.76,993372.55)	59.46(31.29,83.16)	0.23(0.05,0.40)
	Deaths	51675.47(46451.89,54597.79)	8.66(7.75,9.16)	107176.04(85155.00,119223.95)	8.21(6.65,9.08)	0.40(0.21,0.60)	23441.40(11486.43,34450.06)	3.94(1.93,5.81)	52473.44(16490.05,84211.65)	4.11(1.50,6.37)	0.72(0.53,0.92)
Southern Latin America
	DALYs	129077.22(122967.25,134299.34)	289.40(274.58,301.34)	191760.28(172711.97,204173.59)	213.15(192.96,226.64)	-0.67(-0.81,-0.53)	71894.41(55357.29,88611.30)	158.65(118.36,198.15)	115624.92(75590.94,149422.24)	129.88(86.97,166.68)	-0.34(-0.48,-0.20)
	Deaths	6841.35(6396.33,7164.04)	16.29(15.14,17.11)	12723.48(11080.35,13672.72)	13.76(12.02,14.78)	-0.16(-0.33,0.01)	3502.08(2278.49,4658.75)	8.15(4.96,11.09)	7116.21(3480.20,10122.96)	7.75(3.88,10.95)	0.21(0.04,0.37)
High-income North America
	DALYs	515640.10(484537.12,535423.43)	152.13(143.72,157.81)	1404615.30(1265475.86,1544930.15)	236.46(214.40,259.23)	1.81(1.64,1.98)	318548.93(254229.25,382521.41)	95.99(77.80,113.60)	983532.86(778733.28,1178285.63)	172.21(142.82,201.13)	2.31(2.17,2.46)
	Deaths	24616.49(22210.27,25888.72)	6.93(6.27,7.27)	70905.23(60425.29,78879.35)	10.41(9.04,11.53)	1.51(1.33,1.70)	13621.23(9176.96,17788.63)	3.90(2.73,5.02)	44695.39(28218.20,58029.48)	6.81(4.69,8.59)	2.04(1.88,2.20)
Andean Latin America
	DALYs	53307.39(45848.22,60163.54)	267.00(230.82,301.11)	87357.83(70909.41,107067.30)	150.88(122.42,184.93)	-1.30(-1.70,-0.90)	26360.94(20150.90,32832.50)	125.44(93.20,159.74)	51490.61(36478.51,68297.67)	87.42(60.88,117.12)	-0.59(-1.03,-0.14)
	Deaths	2564.26(2219.55,2896.26)	14.45(12.55,16.33)	4698.10(3739.83,5789.53)	8.43(6.72,10.38)	-1.17(-1.56,-0.79)	1094.36(742.45,1480.70)	5.86(3.68,8.28)	2475.36(1383.41,3574.64)	4.38(2.37,6.42)	-0.33(-0.76,0.10)
Central Sub-Saharan Africa
	DALYs	271125.74(146270.79,388597.81)	1325.88(760.65,1837.99)	576634.70(363539.24,813718.95)	1212.96(768.85,1676.91)	-0.34(-0.39,-0.28)	89499.57(45607.78,137882.61)	390.74(195.43,580.93)	291995.48(171820.72,431335.22)	546.75(322.13,825.58)	1.03(0.98,1.07)
	Deaths	10729.67(5988.62,15056.68)	67.49(40.87,91.76)	24393.80(15203.75,33985.63)	66.27(42.16,91.54)	-0.09(-0.14,-0.04)	3259.17(1621.38,4943.32)	17.42(8.38,27.05)	11186.61(6476.40,17052.51)	26.46(14.82,40.53)	1.32(1.28,1.35)
Caribbean
	DALYs	105048.52(86186.53,124827.66)	411.46(340.11,486.72)	220600.20(183390.71,263165.99)	408.86(339.64,488.36)	0.36(0.17,0.56)	47198.00(36942.32,58825.14)	180.52(138.74,228.31)	124032.58(94912.82,153884.55)	230.58(176.69,285.28)	1.20(1.00,1.41)
	Deaths	4753.90(4018.42,5533.32)	20.23(17.27,23.28)	10817.24(9124.13,12624.67)	19.72(16.58,23.04)	0.40(0.18,0.62)	1895.63(1366.07,2465.88)	7.81(5.33,10.44)	5458.94(3575.82,7226.39)	9.98(6.59,13.15)	1.29(1.06,1.53)
Central Latin America
	DALYs	246724.62(236859.48,254859.82)	323.82(307.97,335.72)	400662.51(340653.04,469047.79)	165.65(140.89,193.46)	-2.29(-2.53,-2.05)	130912.49(103853.93,159736.67)	163.52(120.71,206.61)	248376.56(179783.25,324939.78)	101.12(71.30,132.94)	-1.70(-1.95,-1.44)
	Deaths	12432.95(11753.99,12869.44)	18.63(17.38,19.39)	22485.78(18607.35,26036.92)	9.63(7.97,11.13)	-2.21(-2.41,-2.00)	5928.85(4038.57,7926.68)	8.45(5.15,11.79)	12766.86(7671.26,17934.90)	5.40(3.14,7.69)	-1.55(-1.76,-1.33)
Tropical Latin America
	DALYs	401270.09(384917.94,413132.21)	454.96(430.71,470.51)	593660.31(540130.57,645331.85)	234.77(213.10,255.30)	-2.04(-2.17,-1.91)	216908.04(178699.33,256744.34)	231.50(183.38,281.97)	366920.98(286759.99,442702.02)	143.42(110.18,174.44)	-1.49(-1.64,-1.35)
	Deaths	17380.00(16315.94,18047.98)	23.10(21.14,24.22)	30400.87(26559.84,33206.94)	12.39(10.76,13.54)	-1.81(-1.94,-1.68)	8416.62(6356.52,10542.21)	10.36(7.02,13.75)	17128.62(10978.39,22647.96)	6.90(4.29,9.26)	-1.15(-1.30,-1.00)
North Africa and Middle East
	DALYs	1559937.88(1164405.92,1869341.83)	1025.69(782.56,1220.87)	2853076.53(2234018.16,3380025.84)	691.81(551.46,811.13)	-1.19(-1.31,-1.06)	845482.30(596103.96,1089020.19)	522.42(363.93,686.68)	1910274.53(1455254.89,2382733.06)	440.20(317.57,558.72)	-0.49(-0.61,-0.36)
	Deaths	71342.32(54433.61,85056.28)	56.87(43.87,67.97)	138198.25(109881.28,161874.66)	39.52(31.41,46.10)	-1.04(-1.20,-0.88)	35435.59(24344.66,47300.09)	26.35(15.88,36.47)	85253.35(57659.45,110088.12)	23.20(14.02,31.44)	-0.29(-0.46,-0.13)
South Asia
	DALYs	1814725.23(1179624.98,2433894.00)	344.63(226.41,461.84)	4119885.62(3213890.30,5379997.45)	301.48(237.96,391.22)	-0.40(-0.49,-0.31)	399107.39(230379.82,577003.61)	67.92(38.40,98.92)	1490183.34(1049057.58,2077926.25)	101.32(70.52,143.72)	1.41(1.35,1.47)
	Deaths	76535.87(49384.45,103227.77)	17.89(11.73,24.13)	196614.42(154907.23,255704.08)	16.52(13.11,21.36)	-0.17(-0.30,-0.03)	14745.62(8200.08,21657.52)	3.03(1.56,4.88)	61432.96(40106.33,90558.61)	4.73(2.81,7.34)	1.58(1.49,1.67)
Eastern Sub-Saharan Africa
	DALYs	812261.34(499387.56,1042546.40)	1150.28(742.49,1449.81)	1225850.43(839618.46,1550327.23)	785.73(549.19,988.35)	-1.39(-1.48,-1.31)	244965.02(134295.45,342481.51)	311.70(169.90,439.48)	521322.14(338086.20,709149.66)	298.05(180.48,414.03)	-0.32(-0.42,-0.22)
	Deaths	32473.99(20666.66,41222.90)	58.40(39.55,72.59)	52182.20(35762.17,66024.00)	42.54(29.30,54.73)	-1.14(-1.21,-1.07)	8702.27(4742.36,12349.21)	13.61(7.08,19.80)	19480.99(11561.25,27469.83)	13.95(7.65,21.25)	-0.04(-0.13,0.05)
Southern Sub-Saharan Africa
	DALYs	202748.89(179449.94,246299.18)	758.01(665.80,936.49)	483239.47(428226.65,568412.95)	888.71(787.07,1034.65)	0.66(0.20,1.12)	116312.39(95260.42,146331.19)	412.08(317.08,535.70)	328747.64(265704.92,399280.01)	578.12(437.99,722.53)	1.27(0.80,1.75)
	Deaths	8650.73(7518.88,10863.99)	38.15(32.67,48.63)	21595.78(19056.37,25212.82)	47.40(41.31,55.26)	0.84(0.39,1.30)	4448.64(3187.12,5890.12)	18.43(11.70,25.51)	13651.79(9929.21,17284.20)	28.40(17.52,37.54)	1.56(1.08,2.03)
Western Sub-Saharan Africa
	DALYs	613705.71(448089.91,770030.11)	712.26(521.16,887.31)	1165899.52(724194.49,1451505.60)	590.80(379.41,726.57)	-0.78(-0.93,-0.62)	249180.48(165152.24,341063.33)	272.01(178.00,372.99)	628194.11(371114.10,822109.20)	296.30(180.82,399.61)	0.07(-0.10,0.23)
	Deaths	25005.81(18190.05,31384.47)	34.54(25.58,43.64)	45744.56(28893.56,56439.29)	28.78(18.80,34.79)	-0.77(-0.93,-0.61)	9233.39(6018.62,12928.64)	11.76(7.05,17.59)	22546.77(13462.57,30630.45)	13.03(7.79,18.62)	0.10(-0.06,0.27)
High-middle SDI
	DALYs	2890902.40(2550666.89,3230212.97)	315.14(278.46,350.57)	4388543.73(3867161.73,4975999.27)	227.96(200.64,258.08)	-0.93(-1.03,-0.83)	1203847.75(903407.76,1536884.03)	127.41(92.84,165.58)	2296315.14(1583465.30,3023135.06)	118.94(81.23,157.67)	-0.11(-0.30,0.07)
	Deaths	145537.88(128047.55,161860.91)	17.83(15.51,19.76)	275282.97(236120.91,312357.79)	14.60(12.44,16.51)	-0.41(-0.52,-0.29)	55916.48(37392.55,74691.68)	6.62(3.92,9.36)	132674.83(67106.80,191444.32)	7.00(3.38,10.17)	0.44(0.25,0.63)
Low-middle SDI
	DALYs	3108827.08(2200172.27,3747302.03)	544.97(390.32,651.76)	5952686.47(4903475.76,6787476.83)	438.27(363.50,502.20)	-0.69(-0.73,-0.65)	1064622.23(740286.26,1387681.76)	174.50(122.01,231.14)	2774973.37(2163092.18,3408019.47)	192.73(147.45,244.13)	0.39(0.36,0.42)
	Deaths	132628.02(95201.59,158907.41)	28.01(21.10,33.64)	274751.86(226106.07,314983.07)	23.13(19.07,26.52)	-0.56(-0.61,-0.51)	41405.69(28210.78,55454.80)	8.11(5.03,11.49)	113742.71(81654.24,147944.66)	8.96(5.90,12.38)	0.43(0.39,0.47)
High SDI
	DALYs	1695745.90(1580972.21,1768750.33)	155.62(145.05,162.36)	3098439.20(2704829.68,3399991.23)	149.35(134.54,162.67)	0.37(0.15,0.58)	858426.46(643921.17,1067628.28)	79.52(59.95,98.57)	1888249.95(1342868.74,2367628.78)	97.25(76.46,115.81)	1.16(0.99,1.34)
	Deaths	93377.03(84875.30,98204.05)	8.56(7.73,9.02)	188986.70(156646.47,209552.05)	7.70(6.54,8.53)	0.11(-0.07,0.29)	42338.83(25101.68,57793.01)	3.88(2.28,5.34)	101715.04(51587.07,144017.90)	4.38(2.59,5.87)	0.83(0.68,0.98)
Low SDI
	DALYs	1751718.43(1127610.68,2258455.36)	816.61(546.33,1034.11)	3054489.65(2141016.62,3809127.68)	640.45(449.91,784.43)	-0.86(-0.93,-0.78)	550419.25(306311.85,765529.90)	233.39(132.99,326.55)	1318231.52(895030.05,1781084.38)	249.65(164.84,328.72)	0.10(0.02,0.18)
	Deaths	70306.34(46572.32,89523.98)	40.51(28.05,50.69)	129301.02(90743.22,159408.34)	33.56(24.63,40.51)	-0.61(-0.71,-0.52)	19835.38(11275.10,27740.94)	10.04(5.58,14.81)	49041.16(31965.43,64988.74)	11.27(6.94,15.88)	0.30(0.21,0.39)
Middle SDI
	DALYs	6001382.19(4227627.83,6816929.32)	644.88(461.32,729.91)	8930223.42(6899892.63,10419863.71)	355.66(273.24,415.04)	-1.92(-2.15,-1.70)	1979472.99(1355214.40,2590231.95)	197.12(132.36,261.86)	4255946.72(3088318.19,5431403.13)	163.33(112.87,214.45)	-0.60(-0.78,-0.42)
	Deaths	270887.61(191511.45,306756.06)	35.18(25.68,39.52)	461701.61(348619.59,545738.73)	20.26(15.21,23.94)	-1.76(-1.98,-1.53)	80183.26(52532.59,106376.36)	9.61(5.53,13.78)	196804.87(122493.59,276060.94)	8.30(4.53,12.23)	-0.44(-0.64,-0.25)
ASMR,age-standardized mortality rates;ASDR,age-standardized DALY rates; DALYs, disability-adjusted life years; UI, uncertainty interval; CI, confidence Interval; EAPC, estimated annual percentage change.
