# Supplementary material for: Burden of hypertensive heart disease attributed to metabolic factors from 1990 to 2021 at global, regional, and national levels: an analysis of the global burden of disease study 2021
Source: Front Cardiovasc Med. 2025 May 29;12:1572392. doi: 10.3389/fcvm.2025.1572392 (PMC12158952; doi:10.3389/fcvm.2025.1572392)
Supplement: Supplementary file 3 [file Table2.xlsx]

## Sheet: Supplementary Table 2
Deaths and disability-adjusted life years (DALYs) due to metabolic factors-induced hypertensive heart disease across 204 countries and territories from 1990 to 2021.
High systolic blood pressure
Location	1990				2021				1990-2021
	Deaths (95% UI)	DALYs (95% UI)	ASMR/100,000 persons (95% UI)	ASDR/100,000 persons (95% UI)	Deaths (95% UI)	DALYs (95% UI)	ASMR/100,000 persons (95% UI)	ASDR/100,000 persons (95% UI)	EAPC of ASMR (95% CI)	EAPC of ASDR (95% CI)
Zimbabwe	1161.28(931.26,1507.62)	26390.20(21424.97,33865.53)	39.40(31.29,51.50)	726.61(587.32,934.46)	2462.36(1664.06,3482.26)	62947.07(41681.47,89321.74)	47.62(33.61,67.58)	959.96(656.85,1349.66)	1.26(0.81,1.72)	1.53(1.03,2.03)
Zambia	1532.64(1040.42,1951.15)	37842.54(25084.77,48813.93)	71.88(50.47,88.87)	1396.66(955.10,1770.11)	2937.88(1743.73,4055.31)	69492.45(37282.57,99355.63)	61.49(38.60,81.76)	1112.34(683.49,1516.75)	-0.71(-0.84,-0.58)	-1.02(-1.15,-0.88)
Yemen	2867.95(1650.61,4109.05)	68125.97(37061.04,97843.30)	80.86(47.56,113.82)	1536.84(889.93,2170.59)	6874.54(3963.91,11535.53)	154496.24(85024.59,249920.77)	66.31(40.58,108.17)	1206.79(702.58,2011.60)	-0.83(-0.96,-0.70)	-0.97(-1.10,-0.85)
Viet Nam	11251.77(7582.39,15182.37)	237096.04(155873.70,327336.28)	31.92(21.87,42.86)	616.54(413.98,841.38)	18469.28(11993.02,26298.53)	377267.93(243252.30,552818.16)	22.60(14.94,31.46)	410.24(267.77,587.19)	-0.99(-1.09,-0.89)	-1.15(-1.29,-1.01)
Venezuela (Bolivarian Republic of)	2611.28(2430.52,2745.08)	55667.34(52964.72,58241.63)	31.44(28.99,33.22)	598.96(564.31,627.90)	5645.47(4401.13,7149.92)	103791.42(80768.65,133237.81)	20.50(16.09,25.90)	360.41(282.08,461.33)	-1.73(-2.05,-1.41)	-2.03(-2.38,-1.68)
Vanuatu	13.70(8.31,19.91)	391.78(233.22,582.88)	27.52(17.17,38.24)	610.18(372.80,878.19)	35.21(23.93,46.75)	1004.72(690.41,1346.66)	24.35(16.89,31.86)	548.16(376.48,725.13)	-0.42(-0.47,-0.38)	-0.40(-0.47,-0.34)
Uzbekistan	1480.03(1075.05,1977.88)	33615.65(24542.64,44594.38)	13.94(10.18,18.69)	294.28(214.43,391.45)	4138.08(3025.66,5552.88)	96935.97(70240.31,131729.82)	19.64(14.80,26.07)	390.05(286.45,521.25)	1.40(1.17,1.64)	1.12(0.88,1.36)
Uruguay	357.17(329.37,377.90)	6428.92(6038.94,6770.70)	9.22(8.49,9.74)	164.59(154.59,173.25)	828.30(714.59,901.51)	11619.47(10413.87,12503.71)	11.94(10.48,12.93)	187.44(170.34,200.45)	0.73(0.60,0.86)	0.36(0.20,0.52)
United States Virgin Islands	19.52(15.76,24.92)	452.56(363.45,579.93)	30.18(24.42,38.90)	569.87(464.73,721.74)	27.23(20.53,35.87)	516.10(388.17,680.19)	16.09(12.17,21.12)	309.93(233.77,408.07)	-1.60(-1.76,-1.43)	-1.56(-1.72,-1.41)
United States of America	23999.04(21656.39,25245.56)	503246.95(472905.83,522605.91)	7.43(6.73,7.79)	164.03(155.06,170.12)	68679.84(58509.34,76516.87)	1363022.78(1225437.91,1501709.70)	11.36(9.86,12.60)	257.62(233.23,282.89)	1.57(1.39,1.75)	1.84(1.68,2.00)
United Republic of Tanzania	4141.03(2091.74,5538.39)	95720.61(48768.34,130205.95)	52.64(26.44,69.59)	974.48(507.81,1295.24)	7576.88(3342.66,10747.94)	161380.81(77072.53,228792.33)	40.05(17.27,56.69)	702.34(326.31,992.44)	-0.93(-1.01,-0.85)	-1.12(-1.20,-1.04)
United Kingdom	2976.50(2772.39,3079.94)	54963.39(52164.11,56532.49)	3.19(2.97,3.30)	61.89(58.95,63.59)	4810.26(4124.72,5179.92)	78127.47(70805.66,83140.43)	3.24(2.85,3.47)	60.36(55.75,64.02)	0.62(0.42,0.82)	0.49(0.31,0.68)
United Arab Emirates	102.14(71.68,140.06)	2705.17(1947.39,3807.24)	37.83(26.54,52.61)	693.26(495.77,925.44)	450.90(333.69,589.10)	14040.65(10501.25,18557.04)	32.93(24.49,41.05)	545.08(420.76,680.45)	1.56(0.82,2.30)	0.88(0.28,1.49)
Ukraine	3978.15(3546.19,4380.19)	86558.57(77828.87,95715.84)	5.92(5.30,6.51)	123.40(110.62,135.98)	5427.84(4107.27,7028.53)	107661.08(80013.18,141856.55)	6.91(5.22,8.95)	141.83(104.76,186.86)	0.21(-0.07,0.49)	0.20(-0.06,0.46)
Uganda	1850.94(600.85,2916.30)	42686.37(14628.87,69223.43)	38.74(12.76,59.13)	723.86(250.48,1127.67)	3351.31(1238.06,5358.83)	76192.05(31953.20,120489.96)	32.17(11.52,52.35)	574.62(231.50,902.59)	-1.00(-1.18,-0.83)	-1.23(-1.43,-1.03)
Tuvalu	2.43(1.38,3.30)	65.27(37.39,89.73)	45.14(25.83,60.64)	996.00(575.19,1342.77)	2.56(1.72,3.31)	64.33(42.67,84.66)	28.45(19.34,36.62)	625.90(422.76,818.14)	-1.48(-1.54,-1.41)	-1.48(-1.55,-1.41)
Turkmenistan	276.58(201.96,357.51)	6462.46(4709.81,8335.91)	17.12(12.41,22.39)	350.36(255.07,451.26)	707.94(509.66,1004.75)	16264.27(11644.77,23332.12)	20.95(15.25,29.52)	421.39(304.42,599.91)	0.34(0.09,0.58)	0.33(0.08,0.57)
Türkiye	10654.81(7371.01,13897.87)	195461.08(131535.17,259629.29)	41.22(28.49,53.90)	657.93(451.81,860.09)	20572.06(15411.70,25022.64)	328349.46(260772.27,395518.81)	26.00(19.21,31.76)	387.45(307.59,466.72)	-1.15(-1.64,-0.65)	-1.54(-1.94,-1.14)
Tunisia	1624.99(1126.12,2159.32)	34015.57(23753.37,44927.92)	44.75(31.63,58.29)	771.84(546.60,1006.63)	4336.15(2312.68,7326.39)	79324.74(42893.24,131966.21)	37.97(20.48,63.32)	639.81(348.60,1063.02)	-0.49(-0.57,-0.42)	-0.57(-0.63,-0.51)
Trinidad and Tobago	290.10(271.76,304.96)	6031.74(5700.51,6332.09)	42.48(39.81,44.53)	767.65(723.43,802.31)	352.81(271.62,439.66)	7450.39(5766.37,9361.21)	19.08(14.74,23.71)	397.58(307.67,499.19)	-2.68(-2.96,-2.39)	-2.33(-2.61,-2.05)
Tonga	4.10(3.08,5.42)	103.78(79.17,137.39)	8.50(6.40,11.08)	188.16(140.78,247.22)	5.82(4.44,7.64)	132.70(100.88,174.19)	7.54(5.80,9.90)	164.23(125.60,214.99)	-0.39(-0.56,-0.23)	-0.47(-0.62,-0.32)
Tokelau	0.44(0.30,0.59)	9.95(6.74,13.43)	36.07(24.46,47.49)	774.74(527.22,1043.12)	0.31(0.21,0.41)	6.74(4.46,9.13)	21.07(14.05,27.79)	460.10(303.86,626.72)	-1.81(-1.84,-1.78)	-1.78(-1.82,-1.75)
Togo	328.92(223.24,456.05)	8788.60(5862.63,12248.08)	32.52(22.50,44.31)	696.46(477.63,960.62)	1099.55(606.18,1623.16)	29469.41(16162.59,44044.40)	37.27(21.58,53.33)	771.21(439.88,1120.51)	0.45(0.23,0.68)	0.34(0.11,0.58)
Timor-Leste	80.41(42.70,114.68)	2093.54(1088.82,2999.41)	39.33(22.07,54.95)	793.10(428.06,1125.38)	238.18(154.02,328.01)	5352.51(3415.94,7312.04)	32.91(21.28,45.11)	647.77(419.48,876.89)	-0.47(-0.68,-0.25)	-0.56(-0.78,-0.34)
Thailand	1355.51(944.74,1750.94)	31801.43(22340.04,40981.33)	4.87(3.39,6.30)	94.85(67.61,121.54)	3619.48(2705.55,4788.52)	72740.45(56793.89,91753.33)	3.34(2.51,4.41)	68.26(53.40,85.99)	-1.61(-1.78,-1.44)	-1.46(-1.63,-1.29)
Tajikistan	1072.00(699.11,1619.49)	21388.51(14868.11,30151.52)	45.11(28.88,70.54)	822.47(561.41,1159.93)	1348.97(929.98,1880.56)	29763.32(20385.32,41321.40)	33.45(23.45,47.23)	590.77(411.21,818.55)	-1.18(-1.59,-0.77)	-1.29(-1.66,-0.92)
Taiwan (Province of China)	2685.08(2534.84,2816.17)	55221.17(52726.43,57861.02)	23.78(21.71,25.16)	404.88(380.59,424.54)	4920.72(4182.59,5421.78)	84561.48(74849.68,91863.72)	10.90(9.36,12.00)	198.00(177.40,214.68)	-1.37(-2.20,-0.52)	-1.01(-1.91,-0.10)
Syrian Arab Republic	2024.24(1540.43,2530.65)	41476.49(31028.65,53531.74)	49.71(38.01,61.62)	858.71(648.32,1086.49)	3441.76(2521.06,4694.48)	69635.90(50779.69,95894.54)	38.87(29.52,51.50)	629.63(466.38,853.74)	-1.22(-1.51,-0.93)	-1.47(-1.80,-1.15)
Switzerland	961.68(821.61,1083.94)	13197.81(11456.42,14776.67)	8.41(7.16,9.45)	118.63(103.38,132.50)	2296.50(1770.66,2632.98)	26228.80(21108.18,29582.26)	8.60(6.74,9.81)	110.38(91.43,122.81)	0.62(0.18,1.06)	0.27(-0.11,0.64)
Sweden	333.48(292.20,362.00)	5049.51(4530.69,5513.19)	1.95(1.70,2.11)	30.53(27.53,33.18)	1864.62(1486.47,2133.68)	22822.38(18864.22,25833.33)	6.20(4.99,7.07)	83.31(70.21,93.91)	5.26(4.63,5.89)	4.75(4.15,5.35)
Suriname	63.69(54.37,73.66)	1410.81(1201.23,1600.94)	27.44(23.38,31.89)	560.58(479.26,637.53)	125.44(94.64,164.86)	2761.54(2105.86,3611.63)	21.07(15.86,27.67)	440.06(335.70,571.26)	-0.50(-0.68,-0.33)	-0.52(-0.70,-0.34)
Sudan	4862.71(2843.91,6777.74)	111658.82(62453.55,157223.40)	65.31(40.52,89.41)	1264.33(737.77,1750.16)	7729.51(4719.12,11148.56)	172754.21(103085.98,256102.71)	50.60(31.58,72.20)	934.99(571.12,1350.41)	-0.81(-0.95,-0.67)	-0.95(-1.09,-0.82)
Sri Lanka	2786.09(2118.00,3276.83)	63010.50(49641.97,73296.62)	32.65(24.15,38.56)	622.90(480.58,727.24)	3802.10(2414.14,5769.24)	78738.81(49682.30,121248.66)	15.63(10.06,24.21)	300.50(191.16,463.90)	-2.40(-2.59,-2.21)	-2.48(-2.68,-2.28)
Spain	2861.87(2500.71,3103.47)	42054.65(37703.31,45035.06)	5.57(4.82,6.05)	79.20(70.76,84.88)	9732.68(7538.37,11054.73)	113688.02(91864.46,126778.67)	6.57(5.20,7.42)	86.77(71.79,95.92)	0.74(0.57,0.91)	0.48(0.34,0.63)
South Sudan	1063.72(536.89,1575.60)	24768.25(12059.69,37788.21)	52.60(28.31,74.50)	1021.28(518.73,1513.73)	1100.58(517.78,1634.59)	27457.90(12925.87,41611.05)	39.28(19.37,56.77)	760.47(367.55,1115.62)	-1.12(-1.43,-0.81)	-1.14(-1.48,-0.81)
South Africa	6423.39(5426.34,8451.54)	151407.56(130963.57,190054.64)	35.83(29.97,47.74)	723.69(621.82,923.38)	17165.96(14663.30,20240.59)	373785.64(319949.76,443216.90)	46.00(38.96,54.42)	853.94(731.11,1006.01)	0.86(0.37,1.34)	0.59(0.11,1.07)
Somalia	1246.30(670.11,1770.58)	34615.46(17861.59,50835.39)	73.88(44.42,99.61)	1491.40(844.63,2091.05)	2183.15(1048.93,3284.25)	59184.80(28647.59,91080.55)	55.78(28.11,79.37)	1066.92(528.88,1573.91)	-0.84(-0.93,-0.75)	-1.09(-1.19,-0.99)
Solomon Islands	27.42(13.98,43.21)	781.19(385.26,1262.77)	25.38(14.65,37.13)	563.88(297.77,874.79)	62.38(39.10,90.56)	1778.58(1095.02,2648.85)	21.52(14.02,30.15)	482.74(306.01,698.65)	-0.52(-0.56,-0.48)	-0.48(-0.52,-0.43)
Slovenia	403.02(370.09,431.47)	7120.21(6665.69,7574.81)	16.62(15.28,17.78)	290.02(272.07,307.42)	1045.28(850.08,1194.18)	12502.39(10379.68,14269.37)	17.71(14.41,20.23)	230.51(193.74,262.61)	0.95(0.63,1.28)	-0.17(-0.46,0.12)
Slovakia	652.69(474.37,1000.07)	12897.13(9535.07,18537.20)	11.40(8.32,17.64)	219.13(162.15,316.10)	1145.14(811.27,1475.14)	19678.76(14084.61,25728.66)	12.04(8.54,15.43)	207.22(148.60,269.81)	0.76(0.49,1.04)	0.32(0.03,0.60)
Singapore	286.26(268.01,301.43)	6306.94(5989.88,6607.74)	16.34(15.05,17.36)	298.12(281.02,312.89)	535.34(467.50,583.09)	10728.22(9641.41,11613.54)	6.40(5.57,6.98)	126.13(113.16,136.65)	-2.71(-3.11,-2.31)	-2.46(-2.87,-2.04)
Sierra Leone	494.23(317.31,670.63)	11749.79(7623.67,16017.68)	27.48(18.04,36.61)	578.32(381.59,778.90)	933.66(521.51,1293.88)	23890.07(13057.58,33905.13)	29.10(17.32,39.61)	614.69(347.61,851.94)	0.29(-0.01,0.58)	0.33(0.04,0.62)
Seychelles	47.72(41.14,53.16)	963.11(821.98,1073.94)	85.24(73.62,95.15)	1705.61(1454.69,1903.87)	53.96(46.79,64.17)	1111.31(964.61,1334.15)	54.25(46.97,64.50)	1003.86(871.60,1202.43)	-1.43(-1.58,-1.28)	-1.68(-1.83,-1.52)
Serbia	2954.32(2320.70,3794.66)	49744.25(38769.90,65523.41)	38.82(30.29,49.92)	570.41(450.98,736.68)	4540.41(3306.62,5770.09)	66644.65(50445.17,83177.58)	26.13(19.03,32.97)	387.89(292.51,482.54)	-1.59(-1.78,-1.40)	-1.44(-1.59,-1.30)
Senegal	834.73(617.41,1093.30)	21038.86(15508.31,27900.00)	30.24(23.17,38.64)	649.01(481.83,852.98)	2133.34(1392.51,2865.41)	51886.71(34331.59,70091.41)	32.65(21.81,43.88)	671.34(451.36,895.73)	0.23(0.13,0.33)	0.13(0.02,0.23)
Saudi Arabia	2756.51(1770.52,3803.24)	62075.99(38941.17,88046.14)	62.59(40.91,85.76)	1146.27(742.20,1589.86)	6157.98(3350.45,8999.54)	171752.54(94455.57,256868.39)	50.45(28.81,70.13)	927.86(528.67,1317.64)	-0.89(-1.02,-0.76)	-0.82(-0.94,-0.70)
Sao Tome and Principe	10.73(8.66,13.24)	250.03(200.64,296.48)	18.69(15.21,23.12)	395.80(320.15,471.73)	16.08(12.28,21.44)	416.81(317.89,559.53)	17.41(13.38,22.78)	370.16(288.91,486.50)	-0.25(-0.36,-0.15)	-0.34(-0.51,-0.17)
San Marino	3.30(2.56,4.59)	45.23(35.76,62.55)	8.71(6.77,12.13)	121.74(96.61,167.85)	5.74(3.71,7.99)	72.00(49.39,98.39)	4.83(3.10,6.77)	72.98(50.45,101.84)	-0.76(-1.19,-0.33)	-0.54(-0.91,-0.16)
Samoa	25.64(17.11,32.48)	635.89(429.64,812.89)	35.67(23.75,45.41)	758.88(513.65,960.20)	34.00(23.12,43.04)	845.88(569.69,1087.27)	26.73(18.32,34.00)	581.38(395.99,742.07)	-0.97(-1.10,-0.84)	-0.89(-1.03,-0.74)
Saint Vincent and the Grenadines	29.50(27.44,31.38)	592.89(552.49,630.20)	46.01(42.60,48.88)	856.62(795.64,909.97)	71.36(62.52,80.33)	1414.89(1256.74,1601.58)	56.79(49.71,63.56)	1043.67(928.02,1177.35)	0.72(0.14,1.31)	0.69(0.13,1.26)
Saint Lucia	34.41(32.33,36.50)	662.34(623.96,703.89)	48.60(45.72,51.48)	826.78(780.93,875.06)	73.86(61.57,85.97)	1347.67(1128.59,1588.54)	32.48(27.18,37.81)	573.47(481.32,675.22)	-1.17(-1.72,-0.61)	-0.91(-1.44,-0.38)
Saint Kitts and Nevis	10.75(10.03,11.39)	214.14(200.08,227.36)	30.25(28.28,32.04)	590.16(551.33,625.58)	16.51(13.95,18.90)	353.51(293.29,414.52)	31.28(27.05,35.17)	560.84(475.18,644.27)	1.14(0.67,1.62)	0.80(0.29,1.31)
Rwanda	1651.73(377.25,2302.65)	42720.99(9318.12,60398.18)	79.92(21.27,107.35)	1587.97(388.70,2179.27)	1729.58(493.76,2517.50)	38878.97(11882.76,55092.84)	41.12(11.90,61.80)	714.67(219.14,1040.61)	-2.99(-3.34,-2.63)	-3.51(-3.89,-3.13)
Russian Federation	6457.81(6215.07,6654.61)	161045.06(156299.89,165933.07)	3.84(3.67,3.97)	90.83(87.95,93.60)	14925.64(13644.73,16011.06)	283950.80(261105.52,304731.89)	6.21(5.68,6.67)	120.21(110.83,128.94)	1.53(0.19,2.88)	0.56(-0.74,1.88)
Romania	10028.39(9400.00,10604.50)	186450.30(176137.52,196445.08)	43.01(40.13,45.35)	720.50(679.33,757.77)	15086.30(13383.96,16941.45)	227916.59(203473.81,254829.23)	36.10(31.98,40.58)	577.25(516.09,645.28)	0.10(-0.29,0.49)	-0.07(-0.44,0.30)
Republic of Moldova	188.06(171.57,203.81)	4959.50(4533.90,5383.19)	4.89(4.48,5.29)	114.09(104.53,123.47)	1899.16(1671.96,2151.73)	33402.83(29622.83,37619.82)	31.36(27.66,35.54)	552.90(491.66,621.87)	7.18(6.72,7.63)	5.92(5.50,6.34)
Republic of Korea	3214.10(2107.10,3813.32)	68477.94(42774.64,79280.78)	18.07(12.80,21.47)	284.06(191.92,333.03)	4885.23(3483.64,7769.01)	66562.15(51333.86,108791.58)	5.63(4.01,8.83)	75.33(58.36,121.06)	-3.67(-3.97,-3.37)	-4.23(-4.47,-3.99)
Qatar	17.74(14.28,21.74)	444.04(361.47,546.69)	35.56(28.33,43.78)	564.41(455.63,682.26)	54.93(39.57,76.45)	1557.63(1144.29,2212.71)	14.26(10.39,18.32)	226.52(169.16,299.54)	-3.35(-3.95,-2.75)	-3.18(-3.69,-2.67)
Puerto Rico	469.77(442.78,492.98)	9923.24(9447.65,10393.63)	13.84(12.99,14.51)	279.96(266.30,293.33)	960.06(779.41,1121.13)	15895.83(13423.57,18292.55)	10.79(8.83,12.57)	218.55(185.50,252.10)	-0.41(-0.79,-0.03)	-0.47(-0.83,-0.11)
Portugal	1014.45(932.63,1087.18)	15620.72(14520.14,16599.76)	8.87(8.02,9.53)	124.81(114.68,132.72)	2175.77(1775.76,2440.01)	26423.12(22089.37,29362.78)	6.38(5.25,7.13)	86.02(73.59,94.73)	-0.99(-1.15,-0.83)	-1.08(-1.22,-0.94)
Poland	5450.52(5154.93,5616.34)	110528.25(105992.53,113737.92)	13.47(12.64,13.93)	260.60(249.01,268.35)	11067.68(9654.94,12108.19)	180645.93(160018.77,197994.75)	14.17(12.41,15.52)	245.99(218.74,270.36)	0.07(-0.22,0.36)	-0.22(-0.53,0.09)
Philippines	8482.03(7515.66,10023.75)	208543.31(184786.25,241751.69)	36.92(33.08,44.95)	729.91(648.87,853.77)	24775.74(20617.32,28987.58)	597498.57(495758.28,706015.63)	35.61(29.67,41.89)	738.45(618.26,865.80)	0.14(0.05,0.23)	0.23(0.14,0.32)
Peru	968.98(774.62,1168.09)	20269.63(16653.68,24324.04)	9.03(7.20,10.97)	171.87(140.64,204.87)	1702.29(1251.09,2214.93)	32673.74(25760.42,41506.39)	5.07(3.74,6.65)	96.86(76.04,124.02)	-2.10(-2.41,-1.78)	-2.04(-2.35,-1.73)
Paraguay	364.07(304.42,440.14)	7312.46(6217.31,8838.13)	18.27(15.22,22.04)	338.35(289.25,407.10)	976.77(735.41,1255.66)	18648.06(14173.52,24334.80)	18.39(13.81,23.50)	331.82(253.70,428.93)	0.34(0.22,0.46)	0.12(0.02,0.23)
Papua New Guinea	336.89(175.99,509.46)	10175.17(5099.35,15585.82)	22.38(12.11,34.19)	525.53(281.58,791.63)	780.18(426.32,1275.09)	23372.10(12735.82,38300.56)	18.03(9.90,29.17)	416.97(233.92,673.68)	-0.75(-0.78,-0.72)	-0.80(-0.84,-0.76)
Panama	82.17(74.47,88.40)	1637.40(1508.21,1748.76)	6.10(5.51,6.54)	113.43(104.24,121.45)	362.08(274.80,431.12)	6208.30(4945.87,7322.18)	7.84(5.98,9.33)	138.16(110.35,162.77)	0.49(-0.07,1.05)	0.29(-0.25,0.82)
Palestine	411.86(284.59,568.53)	7862.96(5430.20,10957.06)	60.79(42.63,83.43)	1011.37(695.69,1392.90)	639.13(513.80,767.66)	12551.48(10147.64,15288.03)	38.92(31.17,46.68)	614.82(498.76,738.29)	-1.39(-1.61,-1.17)	-1.57(-1.74,-1.40)
Palau	0.90(0.70,1.20)	23.51(17.91,31.66)	11.08(8.65,14.39)	241.46(185.15,320.85)	1.53(1.17,1.98)	41.39(30.87,54.42)	8.57(6.73,10.75)	186.05(143.97,239.60)	-0.71(-0.77,-0.64)	-0.78(-0.82,-0.73)
Pakistan	9919.62(6285.01,13289.41)	211162.64(134576.31,275895.71)	21.85(14.12,29.42)	403.29(262.58,532.80)	20682.77(14668.82,28340.84)	461865.02(330710.39,616308.19)	23.42(17.02,31.90)	420.66(304.34,570.89)	-0.03(-0.33,0.27)	-0.15(-0.47,0.17)
Oman	256.28(175.26,373.33)	5949.56(3974.65,8532.30)	49.78(34.80,73.01)	940.10(642.94,1362.64)	556.77(408.39,705.05)	12902.75(9334.83,16787.01)	43.89(32.66,55.09)	760.87(568.17,962.85)	0.46(-0.11,1.02)	0.12(-0.31,0.56)
Norway	214.85(188.77,229.43)	3139.03(2831.57,3318.02)	2.78(2.44,2.96)	42.45(38.53,44.79)	264.79(209.80,294.77)	3286.74(2717.52,3615.94)	2.01(1.62,2.24)	27.40(23.30,30.00)	-0.52(-1.09,0.05)	-0.93(-1.52,-0.33)
Northern Mariana Islands	1.12(0.80,1.46)	35.97(25.51,47.42)	8.55(6.26,10.90)	183.38(134.38,234.47)	2.83(2.24,3.31)	74.52(58.92,86.47)	6.97(5.53,8.19)	145.24(115.75,168.39)	-0.59(-0.76,-0.42)	-0.63(-0.75,-0.50)
North Macedonia	603.95(477.54,753.81)	10462.39(8469.80,13293.01)	39.64(31.08,49.28)	636.51(514.79,795.15)	1000.62(735.14,1315.29)	16660.54(12383.26,21993.16)	45.79(32.68,59.00)	635.60(472.01,827.93)	0.58(0.12,1.04)	0.17(-0.18,0.53)
Niue	0.72(0.49,0.91)	14.26(9.81,18.32)	30.55(20.66,38.81)	641.06(442.98,820.59)	0.48(0.32,0.60)	10.49(6.96,13.58)	23.23(15.39,29.20)	495.60(328.39,640.56)	-1.04(-1.08,-0.99)	-1.02(-1.08,-0.96)
Nigeria	12863.49(9203.13,16826.55)	301511.71(214249.56,395596.36)	35.45(25.62,46.82)	705.41(507.48,918.44)	17517.61(10613.80,23154.13)	436670.31(256380.12,584969.33)	24.13(15.27,31.19)	482.83(297.11,636.43)	-1.62(-1.84,-1.41)	-1.59(-1.81,-1.38)
Niger	614.23(251.93,914.27)	16420.21(7042.38,24440.70)	29.18(11.82,43.21)	607.33(265.12,899.13)	1703.63(638.17,2607.63)	44399.88(17814.29,67670.67)	26.11(9.48,39.89)	545.68(218.35,824.80)	-0.48(-0.63,-0.32)	-0.47(-0.63,-0.31)
Nicaragua	174.76(150.43,215.25)	3612.63(3169.60,4271.95)	13.85(11.73,17.31)	250.82(219.95,300.41)	421.65(337.06,529.75)	8290.52(6694.71,10423.59)	10.33(8.11,12.98)	182.86(148.10,228.38)	-0.98(-1.18,-0.78)	-1.13(-1.30,-0.96)
New Zealand	150.07(135.33,159.35)	2763.15(2575.04,2916.87)	4.06(3.63,4.33)	72.68(67.44,76.84)	202.38(168.31,222.59)	3067.41(2695.54,3325.77)	2.15(1.80,2.36)	35.27(31.38,38.09)	-2.41(-2.72,-2.10)	-2.76(-3.14,-2.37)
Netherlands	479.33(422.52,515.11)	7569.38(6860.16,8030.02)	2.36(2.07,2.54)	37.38(33.95,39.61)	1212.49(989.45,1346.07)	15239.32(12861.36,16730.93)	2.92(2.40,3.24)	38.65(33.02,42.27)	1.13(0.82,1.43)	0.58(0.30,0.86)
Nepal	1445.53(874.48,2043.54)	33592.84(19644.35,47332.73)	21.53(13.16,30.21)	402.05(245.58,563.85)	3808.54(2769.69,5261.33)	77054.48(55790.91,106285.84)	21.38(15.65,29.62)	369.52(270.22,509.55)	0.13(-0.24,0.50)	-0.12(-0.49,0.26)
Nauru	1.57(0.79,2.24)	47.33(23.00,68.21)	41.27(22.15,57.30)	960.10(488.48,1350.99)	1.66(0.88,2.40)	48.89(25.57,71.31)	33.79(18.47,47.86)	783.63(423.90,1130.28)	-0.74(-0.99,-0.50)	-0.76(-1.02,-0.49)
Namibia	283.85(210.19,377.09)	6901.38(5257.01,9100.60)	59.56(44.45,77.64)	1159.27(869.83,1529.28)	576.64(395.09,797.19)	12990.91(8647.10,18090.67)	56.51(40.58,77.24)	1039.50(716.73,1437.05)	-0.37(-0.68,-0.05)	-0.61(-0.95,-0.27)
Myanmar	8929.43(3571.72,13263.31)	227707.45(86619.32,339734.31)	46.18(19.87,67.08)	997.61(405.43,1474.79)	11902.81(6142.78,17234.82)	270556.46(139021.63,392434.85)	28.83(14.90,41.19)	575.82(303.61,829.86)	-1.84(-1.96,-1.72)	-2.10(-2.22,-1.98)
Mozambique	2823.16(1869.11,3597.32)	66285.95(42734.19,86512.93)	67.42(48.00,84.59)	1238.78(830.49,1573.55)	5336.53(3325.55,7589.55)	126773.74(77277.05,184925.54)	71.89(45.49,102.18)	1282.03(819.25,1817.80)	0.65(0.48,0.83)	0.54(0.37,0.71)
Morocco	6525.69(3817.01,9174.23)	137431.72(79389.58,195686.76)	53.89(32.46,75.08)	1010.97(592.59,1426.86)	13733.25(8577.41,18983.91)	274248.23(170906.61,384237.50)	48.90(31.35,67.44)	863.30(544.73,1194.93)	-0.07(-0.22,0.09)	-0.29(-0.43,-0.15)
Montenegro	51.10(40.09,67.87)	945.88(743.76,1259.27)	8.99(7.07,11.86)	157.86(124.82,209.12)	105.54(79.00,137.61)	1734.53(1310.43,2278.49)	12.72(9.57,16.53)	192.11(145.54,250.49)	1.31(1.04,1.58)	0.76(0.65,0.87)
Mongolia	125.75(79.41,185.43)	2740.47(1726.19,4027.79)	13.78(8.72,20.26)	273.64(173.11,401.15)	152.17(102.18,217.08)	3505.13(2386.96,4934.40)	9.01(6.01,12.74)	167.90(114.66,237.44)	-1.89(-2.12,-1.65)	-2.08(-2.32,-1.83)
Monaco	5.18(3.69,7.56)	73.05(53.19,105.25)	6.19(4.44,8.97)	94.15(69.15,136.27)	9.09(6.33,12.08)	117.47(85.28,151.24)	6.90(4.84,9.10)	101.42(73.54,131.06)	0.56(0.11,1.01)	0.44(0.02,0.86)
Micronesia (Federated States of)	18.60(11.14,25.04)	482.14(290.47,664.28)	44.65(27.18,59.49)	994.30(609.22,1350.65)	20.57(12.99,28.01)	578.08(365.60,800.67)	34.17(21.81,44.90)	761.14(486.31,1024.20)	-0.91(-0.95,-0.87)	-0.91(-0.95,-0.87)
Mexico	4324.69(4134.38,4433.65)	79016.40(75840.11,81220.44)	13.77(13.06,14.15)	215.41(205.63,221.51)	8849.34(6868.77,10367.73)	155252.22(120518.48,186206.50)	8.05(6.27,9.37)	131.61(103.15,156.73)	-1.47(-1.76,-1.18)	-1.37(-1.67,-1.07)
Mauritius	273.65(257.00,292.04)	6386.44(5999.22,6786.47)	44.83(41.47,48.00)	908.17(853.75,964.67)	453.52(408.07,482.18)	8987.58(8209.26,9472.57)	27.27(24.47,29.04)	516.09(470.90,542.84)	-1.23(-1.85,-0.60)	-1.49(-2.15,-0.83)
Mauritania	397.31(251.47,560.88)	9491.18(6011.59,13223.60)	45.78(29.97,64.44)	962.00(620.32,1332.18)	678.27(406.90,1036.84)	15823.01(9379.18,24436.09)	36.60(22.67,55.26)	742.73(447.90,1131.32)	-0.88(-0.97,-0.79)	-0.99(-1.08,-0.90)
Marshall Islands	5.41(3.49,7.55)	146.67(94.93,206.20)	40.97(25.89,55.91)	895.75(581.70,1243.73)	9.29(5.70,13.20)	282.01(173.02,406.37)	32.85(20.97,44.64)	750.65(467.41,1052.10)	-0.79(-0.89,-0.70)	-0.65(-0.76,-0.54)
Malta	26.00(23.34,28.28)	421.43(386.92,455.29)	7.02(6.25,7.62)	105.94(96.98,114.69)	63.08(50.50,71.41)	867.46(725.61,966.24)	5.39(4.38,6.06)	80.78(68.78,89.60)	-0.11(-0.40,0.19)	-0.12(-0.39,0.14)
Mali	1058.02(483.67,1458.80)	28482.82(13144.78,40051.75)	32.46(15.07,44.18)	713.80(336.35,979.73)	2038.14(1017.70,2923.47)	55425.80(28621.75,79621.64)	27.67(13.94,38.68)	602.90(314.02,851.34)	-0.49(-0.55,-0.43)	-0.54(-0.60,-0.48)
Maldives	13.54(5.59,20.30)	350.68(137.95,526.46)	20.46(8.84,30.25)	418.39(178.10,622.29)	25.28(19.74,31.26)	538.10(425.55,667.54)	9.23(7.10,11.45)	167.33(133.00,204.71)	-2.83(-3.01,-2.66)	-3.28(-3.50,-3.06)
Malaysia	756.03(519.01,904.11)	17421.58(12004.13,20991.12)	9.19(6.32,11.00)	192.32(131.91,230.53)	1441.27(1220.82,1744.10)	32767.99(27792.67,38852.13)	5.87(4.98,7.18)	118.85(101.05,140.48)	-2.09(-2.40,-1.78)	-2.16(-2.46,-1.86)
Malawi	1173.46(561.68,1614.70)	29227.32(13267.15,40472.19)	42.23(22.27,57.11)	818.34(410.94,1116.32)	2221.87(1236.11,3070.76)	52945.65(29576.99,73182.00)	42.22(23.85,59.06)	777.22(439.62,1071.34)	-0.18(-0.32,-0.04)	-0.40(-0.56,-0.24)
Madagascar	3418.99(2389.20,4392.35)	85666.28(58518.86,111994.49)	83.48(59.41,106.47)	1709.42(1181.41,2203.28)	6057.88(3995.24,8374.06)	163905.12(107150.62,227725.75)	77.56(51.09,107.64)	1507.06(1003.53,2071.52)	-0.28(-0.32,-0.24)	-0.45(-0.50,-0.40)
Luxembourg	31.14(28.13,33.32)	470.59(434.72,501.45)	6.23(5.62,6.65)	89.64(83.03,95.29)	67.67(56.29,76.84)	852.52(729.62,953.32)	5.18(4.35,5.87)	70.06(60.57,78.10)	-0.10(-0.34,0.14)	-0.29(-0.52,-0.06)
Lithuania	152.29(133.19,171.27)	3537.42(3042.79,3999.32)	3.44(3.01,3.87)	79.54(68.42,90.02)	695.26(600.77,791.28)	11500.26(9980.32,13147.45)	10.56(9.12,11.98)	196.50(169.78,224.87)	4.67(3.98,5.36)	3.79(3.07,4.52)
Libya	509.49(311.22,730.93)	10746.85(6436.32,15717.25)	31.23(19.37,44.67)	584.78(357.76,840.81)	1541.98(930.90,2356.53)	33547.76(20264.81,53114.91)	36.93(22.56,54.69)	680.76(415.34,1044.96)	1.09(0.90,1.28)	0.88(0.73,1.03)
Liberia	360.84(250.24,478.60)	8802.38(6067.39,11683.08)	36.47(26.05,47.80)	771.18(541.13,1010.15)	697.90(396.22,1026.52)	18904.10(10487.34,27620.10)	39.87(23.73,58.36)	840.34(488.78,1224.46)	0.25(0.09,0.42)	0.22(0.06,0.38)
Lesotho	393.11(276.61,524.69)	8506.21(6074.38,11404.61)	56.09(39.87,76.43)	1069.76(767.36,1429.87)	640.65(342.83,904.16)	15571.74(8246.18,22470.66)	75.75(42.14,106.06)	1525.51(830.39,2154.08)	1.79(1.31,2.28)	1.92(1.41,2.42)
Lebanon	530.82(210.52,809.58)	10743.55(4156.18,16171.18)	31.34(12.85,47.32)	550.55(219.61,828.94)	830.99(660.23,1012.43)	12932.59(10583.36,15590.52)	12.31(9.82,14.98)	201.52(165.49,244.59)	-3.31(-3.48,-3.14)	-3.53(-3.73,-3.33)
Latvia	99.39(88.55,109.69)	2395.91(2127.05,2655.70)	2.86(2.54,3.15)	68.83(61.04,76.27)	911.81(786.86,1027.82)	14190.04(12345.64,16026.34)	19.55(16.96,22.09)	338.48(295.01,382.94)	8.60(7.31,9.92)	6.97(5.77,8.18)
Lao People's Democratic Republic	958.09(401.71,1432.88)	24516.24(9952.89,37679.11)	56.15(23.20,82.33)	1206.20(510.08,1799.14)	1280.03(771.77,1728.66)	30760.86(19040.79,41640.23)	34.95(21.66,46.41)	691.35(423.52,929.26)	-1.63(-1.73,-1.53)	-1.88(-1.98,-1.78)
Kyrgyzstan	305.19(256.02,365.64)	6983.64(5955.23,8137.88)	11.33(9.42,13.69)	239.12(203.20,280.81)	695.96(584.86,823.64)	15587.94(13005.09,18584.46)	17.73(14.91,20.89)	343.98(289.75,407.36)	1.15(0.73,1.56)	0.81(0.46,1.15)
Kuwait	179.04(159.89,194.11)	4416.10(4083.61,4759.56)	41.79(36.08,45.66)	771.68(695.44,834.41)	360.49(284.63,453.71)	7212.18(5807.18,9160.60)	16.99(13.24,21.35)	279.95(223.40,354.93)	-2.78(-3.12,-2.44)	-3.16(-3.51,-2.81)
Kiribati	5.33(3.60,6.68)	154.16(102.51,190.57)	16.79(11.76,21.27)	398.70(271.69,496.09)	8.86(5.93,11.72)	258.49(170.34,346.27)	14.80(10.14,18.98)	339.40(230.41,445.51)	-0.45(-0.47,-0.43)	-0.57(-0.60,-0.55)
Kenya	2242.12(1695.24,2785.79)	50583.49(37967.54,61932.69)	35.35(27.21,43.89)	659.04(497.26,810.27)	6001.00(3942.34,7728.21)	134895.74(91275.68,172570.32)	39.37(26.02,51.10)	682.32(455.31,873.25)	0.82(0.63,1.00)	0.52(0.36,0.69)
Kazakhstan	1134.91(1031.87,1251.59)	28294.12(25653.70,31081.19)	9.75(8.87,10.78)	222.72(201.80,244.78)	1306.47(1058.96,1578.59)	29027.28(23301.28,35559.99)	9.23(7.58,11.00)	173.84(141.30,210.47)	-1.16(-2.85,0.57)	-1.94(-3.69,-0.16)
Jordan	547.33(408.02,715.81)	12508.86(9336.33,16192.55)	57.41(43.57,75.71)	1044.65(784.36,1367.52)	1867.27(1436.71,2343.37)	40071.36(30960.19,50167.62)	37.21(28.82,46.71)	631.62(491.64,785.27)	-1.46(-1.65,-1.27)	-1.74(-1.95,-1.54)
Japan	13657.03(11866.62,14627.72)	210791.79(190297.42,222534.17)	9.57(8.18,10.33)	137.70(122.78,146.02)	15941.46(11793.53,18386.23)	193580.24(156556.39,218468.04)	2.56(2.02,2.88)	40.94(35.45,44.66)	-3.75(-4.72,-2.77)	-3.58(-4.47,-2.67)
Jamaica	788.12(729.89,835.04)	14123.83(13278.67,14922.98)	42.41(39.30,44.91)	775.22(729.03,818.36)	1036.07(821.55,1307.06)	19791.75(15770.78,25458.93)	30.76(24.40,39.11)	622.38(494.70,803.45)	-0.03(-0.81,0.75)	0.12(-0.54,0.79)
Italy	12095.05(10638.52,12842.23)	184274.29(167106.70,194524.28)	13.97(12.16,14.89)	206.07(186.03,217.89)	32845.06(25496.86,36863.07)	383807.57(312641.93,424663.54)	15.14(11.99,16.88)	198.12(165.63,216.99)	0.46(0.34,0.58)	-0.01(-0.12,0.11)
Israel	243.48(219.43,260.32)	3895.10(3589.39,4142.44)	5.60(4.98,6.01)	83.65(76.66,88.89)	352.00(282.89,392.84)	4721.34(4019.11,5179.59)	2.39(1.94,2.65)	34.54(29.98,37.72)	-2.80(-3.61,-1.99)	-2.81(-3.60,-2.02)
Ireland	137.15(125.01,146.81)	2134.40(1981.94,2266.62)	3.73(3.37,4.01)	54.62(50.40,57.94)	191.35(152.00,216.03)	2668.94(2251.43,2959.67)	2.21(1.76,2.49)	32.04(27.28,35.52)	-0.63(-0.89,-0.37)	-0.76(-1.01,-0.52)
Iraq	2692.31(1709.47,3633.34)	56403.19(35116.30,75727.67)	37.37(23.86,50.51)	725.33(454.69,972.59)	5693.15(4331.20,7231.59)	120697.58(90951.00,156144.26)	34.12(26.06,42.55)	585.35(447.29,742.49)	-0.85(-1.04,-0.67)	-1.20(-1.36,-1.04)
Iran (Islamic Republic of)	7253.95(5978.89,9508.70)	166871.52(139323.70,213606.11)	41.80(33.78,56.29)	745.35(615.48,975.75)	18771.66(15724.84,22350.27)	354256.16(301494.65,405448.93)	28.90(24.03,34.78)	495.07(420.37,572.79)	-0.80(-0.99,-0.60)	-0.91(-1.10,-0.73)
Indonesia	25656.74(14761.14,34058.01)	652081.46(376470.68,861639.41)	32.40(18.83,43.24)	682.48(398.06,900.73)	59163.66(37140.55,77086.01)	1407650.75(880729.38,1837769.54)	32.92(21.21,42.37)	632.68(403.47,818.20)	0.09(-0.02,0.20)	-0.22(-0.32,-0.11)
India	55353.65(33995.03,79173.17)	1361015.93(851793.47,1935893.12)	16.02(9.83,23.10)	317.75(198.87,451.33)	149563.14(112705.93,192037.51)	3157702.48(2353961.07,4063440.35)	15.30(11.61,19.58)	283.81(213.89,364.55)	0.05(-0.17,0.27)	-0.27(-0.42,-0.13)
Iceland	10.44(8.91,11.45)	151.03(134.79,162.73)	3.35(2.87,3.66)	50.25(45.16,53.99)	23.98(19.05,27.78)	297.47(248.18,341.15)	3.24(2.63,3.74)	44.43(37.70,50.49)	0.85(0.50,1.21)	0.50(0.20,0.81)
Hungary	4052.83(3714.43,4421.69)	74333.32(69272.03,79596.99)	30.13(27.53,32.78)	523.59(488.08,559.78)	6132.20(5378.61,6707.61)	96903.95(86351.99,106057.43)	28.30(25.01,30.96)	478.99(429.48,526.16)	0.83(0.32,1.35)	0.59(0.10,1.08)
Honduras	426.31(340.90,637.05)	9923.20(8177.54,13417.60)	25.79(20.41,41.02)	501.08(408.67,720.62)	1567.65(1204.31,2172.51)	32991.85(26159.00,43647.88)	31.26(23.84,44.87)	564.10(449.94,760.52)	0.76(0.55,0.96)	0.53(0.38,0.69)
Haiti	1132.43(480.44,1794.98)	28712.24(11623.31,46091.68)	45.20(20.71,70.24)	925.65(404.34,1460.23)	2004.76(968.28,3082.86)	50715.28(24001.21,78996.67)	35.69(18.38,54.22)	722.23(356.83,1108.35)	-0.72(-0.76,-0.67)	-0.74(-0.78,-0.69)
Guyana	278.20(252.50,303.73)	6411.74(5820.18,7059.77)	84.95(77.07,92.37)	1724.84(1566.04,1891.35)	348.92(278.47,432.89)	8474.83(6606.86,10823.81)	63.49(51.10,77.12)	1330.37(1050.39,1667.64)	-0.34(-0.68,-0.00)	-0.18(-0.58,0.23)
Guinea-Bissau	164.45(82.36,240.41)	4555.08(2222.93,6740.67)	49.19(26.73,69.47)	1112.59(572.31,1607.49)	289.83(151.34,422.75)	8396.31(4440.24,12381.70)	50.47(27.32,72.62)	1088.55(579.24,1568.68)	0.08(-0.13,0.29)	-0.09(-0.30,0.12)
Guinea	946.38(582.29,1351.12)	22813.09(13805.55,31968.86)	32.04(19.94,45.32)	693.28(427.23,974.63)	1653.98(1022.49,2259.12)	41143.72(24905.10,57044.05)	33.95(21.69,45.29)	717.15(447.36,983.40)	0.23(-0.03,0.49)	0.13(-0.11,0.37)
Guatemala	202.86(192.78,212.39)	4608.86(4401.35,4825.30)	8.84(8.32,9.29)	153.88(146.24,161.59)	439.52(376.34,502.41)	7910.97(6783.68,9142.13)	5.05(4.31,5.73)	80.26(69.13,92.06)	-1.16(-1.64,-0.68)	-1.59(-2.10,-1.07)
Guam	25.21(15.38,30.01)	658.29(417.16,799.52)	45.26(27.04,53.17)	899.45(558.26,1059.47)	21.99(17.81,32.51)	596.15(489.23,855.04)	10.32(8.41,15.22)	289.48(238.69,416.08)	-4.61(-5.30,-3.92)	-3.58(-4.23,-2.93)
Grenada	21.39(19.35,23.17)	414.59(379.34,448.52)	27.26(24.72,29.55)	578.00(528.70,627.61)	33.22(29.27,37.06)	707.44(616.77,791.51)	34.51(30.20,38.11)	651.75(572.31,726.18)	1.17(0.95,1.40)	0.84(0.58,1.10)
Greenland	2.95(2.42,3.80)	90.59(74.80,115.36)	10.70(8.68,13.76)	237.28(194.93,303.86)	3.54(2.73,4.46)	98.79(75.47,124.49)	6.17(4.85,7.65)	145.82(113.18,180.36)	-1.53(-1.75,-1.31)	-1.27(-1.52,-1.02)
Greece	1164.59(1033.42,1241.63)	17015.04(15498.42,17978.15)	8.58(7.53,9.17)	118.61(107.46,125.22)	3423.33(2888.74,3758.94)	40268.60(34858.04,43775.75)	9.60(8.23,10.48)	129.10(114.62,138.76)	1.07(0.51,1.64)	1.01(0.46,1.57)
Ghana	2033.91(1405.43,2653.11)	54876.09(37232.00,71398.84)	39.60(28.53,51.63)	860.88(601.55,1119.10)	4460.98(2724.58,6041.94)	115966.17(69975.76,159091.00)	33.05(20.87,44.63)	688.63(425.98,929.13)	-0.83(-1.04,-0.61)	-0.95(-1.17,-0.73)
Germany	20394.80(18199.74,21813.31)	321482.75(297811.27,340403.28)	15.20(13.51,16.22)	244.91(227.28,258.41)	32254.83(25629.95,36182.89)	385443.19(318952.62,427673.12)	12.32(9.88,13.73)	159.08(134.87,174.65)	0.44(0.03,0.85)	-0.24(-0.60,0.13)
Georgia	750.98(618.75,884.33)	16254.09(13505.98,19305.03)	13.07(10.77,15.41)	267.65(222.55,317.72)	2963.50(2563.10,3334.94)	47085.03(41199.69,53202.45)	44.80(39.19,50.25)	759.17(664.85,857.06)	6.88(5.48,8.29)	5.76(4.49,7.05)
Gambia	90.62(63.87,125.24)	2337.35(1629.67,3224.08)	32.18(23.36,44.23)	670.15(475.34,916.66)	337.37(205.62,475.96)	8406.58(5085.22,11939.24)	40.45(24.71,56.20)	840.03(512.81,1172.90)	0.64(0.45,0.82)	0.59(0.37,0.80)
Gabon	372.77(248.79,499.47)	7989.28(5204.63,10952.08)	79.33(53.36,106.16)	1496.68(988.97,2023.32)	488.91(303.58,708.19)	10781.05(6658.30,15597.21)	64.82(39.63,97.11)	1162.88(723.05,1672.85)	-0.77(-0.92,-0.63)	-0.96(-1.12,-0.80)
France	6189.25(5481.38,6718.71)	89254.43(80437.02,96499.79)	6.91(6.12,7.49)	101.22(91.68,108.97)	9334.43(7309.21,10498.20)	118102.01(97827.68,132872.49)	4.15(3.33,4.64)	61.86(52.75,68.86)	-1.55(-1.70,-1.41)	-1.53(-1.64,-1.41)
Finland	463.20(411.41,503.27)	7660.11(7054.37,8201.53)	6.49(5.72,7.03)	106.99(98.35,114.12)	2080.48(1635.12,2344.72)	26827.44(22116.42,29731.26)	12.43(9.96,13.87)	183.24(155.66,200.47)	3.22(2.43,4.03)	2.97(2.25,3.70)
Fiji	91.40(71.70,113.56)	2585.11(2032.69,3229.24)	31.32(24.92,39.30)	688.95(543.36,855.28)	153.25(115.08,201.53)	3953.67(2913.08,5278.85)	25.22(19.57,32.72)	526.86(402.23,687.10)	-1.01(-1.19,-0.82)	-1.09(-1.22,-0.96)
Ethiopia	9582.17(5413.99,12460.56)	257445.86(142206.04,337269.70)	66.85(40.96,85.50)	1364.44(800.21,1765.52)	10929.41(7787.40,14743.94)	247217.60(177757.23,329056.78)	32.02(22.99,43.49)	600.10(434.63,800.75)	-2.88(-3.07,-2.69)	-3.19(-3.39,-2.98)
Eswatini	148.17(94.88,193.95)	3640.16(2329.18,4765.53)	67.97(43.03,90.39)	1341.17(867.38,1743.94)	268.83(138.52,402.12)	6977.18(3618.41,10719.97)	62.98(34.71,89.34)	1287.66(687.04,1900.11)	0.20(-0.23,0.64)	0.23(-0.26,0.73)
Estonia	217.97(191.51,243.79)	5478.57(4725.55,6202.62)	11.07(9.72,12.39)	277.05(237.76,314.03)	2309.87(1954.97,2594.47)	31622.08(27265.59,35588.81)	68.64(58.55,77.08)	1037.83(899.26,1170.67)	8.60(7.39,9.81)	6.30(5.27,7.35)
Eritrea	604.08(314.05,848.08)	17440.77(8695.45,25149.04)	86.44(53.55,114.29)	1697.44(967.22,2302.29)	1069.99(665.36,1515.96)	26623.44(16379.32,38745.81)	63.19(40.34,89.01)	1124.48(717.98,1564.74)	-1.06(-1.13,-0.99)	-1.36(-1.46,-1.27)
Equatorial Guinea	128.57(76.95,186.15)	3185.72(1854.88,4718.23)	88.36(54.90,124.90)	1770.16(1074.22,2561.52)	183.60(105.22,292.11)	4293.97(2433.31,6811.11)	50.93(29.39,81.78)	934.90(543.16,1478.18)	-2.01(-2.31,-1.71)	-2.33(-2.66,-2.00)
El Salvador	208.07(174.55,255.25)	4164.61(3530.91,4830.50)	7.43(6.24,9.15)	142.54(120.84,166.66)	364.20(279.27,474.54)	6173.60(4911.40,7800.24)	5.28(4.09,6.83)	95.14(75.70,120.50)	-1.09(-1.31,-0.88)	-1.33(-1.58,-1.07)
Egypt	16881.36(13746.99,23361.60)	390385.45(317654.78,522039.91)	97.88(78.59,141.90)	1695.97(1390.81,2336.86)	26390.14(21241.35,34228.23)	617647.11(495498.71,779188.82)	64.34(52.38,85.43)	1145.82(936.03,1478.35)	-0.94(-1.12,-0.76)	-1.00(-1.15,-0.84)
Ecuador	1094.45(1029.43,1156.02)	21977.72(20911.12,23057.33)	24.78(23.30,26.09)	431.24(409.98,453.06)	1903.02(1507.01,2368.56)	32541.59(25462.43,41478.49)	13.56(10.90,16.70)	213.45(168.42,269.64)	-0.49(-1.33,0.35)	-0.86(-1.74,0.03)
Dominican Republic	674.39(561.37,820.06)	15296.99(12972.19,18766.95)	22.71(18.96,27.69)	428.78(362.52,520.97)	1744.70(1297.32,2388.73)	36462.21(27529.85,49076.97)	18.09(13.41,24.81)	365.08(275.28,492.32)	-0.11(-0.37,0.16)	-0.00(-0.20,0.19)
Dominica	32.62(27.58,38.15)	601.01(515.41,694.58)	57.49(48.71,66.81)	1030.14(888.89,1189.25)	37.83(30.98,46.34)	736.30(594.70,920.14)	49.39(40.41,60.16)	908.32(740.04,1123.89)	-0.36(-0.54,-0.19)	-0.22(-0.42,-0.02)
Djibouti	56.45(37.17,78.09)	1498.65(982.00,2098.56)	64.71(43.46,91.09)	1213.73(805.75,1675.52)	180.55(115.97,270.63)	4515.58(2917.67,6916.83)	46.05(29.86,67.62)	822.32(540.82,1217.62)	-1.26(-1.32,-1.19)	-1.43(-1.50,-1.36)
Denmark	229.60(207.55,248.91)	3629.01(3302.48,3893.96)	2.61(2.36,2.81)	42.78(39.03,45.86)	305.76(254.07,339.23)	4182.37(3639.69,4574.96)	2.16(1.81,2.38)	31.92(28.00,34.81)	-0.56(-0.88,-0.24)	-0.94(-1.21,-0.67)
Democratic Republic of the Congo	6588.11(3056.37,9660.80)	166587.77(76426.67,245135.45)	59.62(29.90,84.50)	1172.52(566.86,1702.60)	16362.93(9583.91,23627.70)	381198.82(222041.08,550683.25)	66.35(40.24,95.19)	1208.89(721.28,1729.07)	0.38(0.29,0.47)	0.11(0.02,0.20)
Democratic People's Republic of Korea	3244.57(2052.07,4664.16)	68015.61(41261.74,96221.14)	29.45(18.96,42.82)	504.08(318.31,712.77)	7459.13(5334.84,10045.80)	142246.86(101724.62,188085.90)	26.82(19.34,36.58)	465.31(336.91,621.61)	-0.07(-0.22,0.08)	-0.06(-0.20,0.08)
Czechia	502.43(471.42,529.47)	10559.25(9941.93,11131.46)	3.75(3.51,3.95)	78.10(73.51,82.41)	2283.48(1982.93,2544.60)	34913.75(30806.66,38971.24)	9.69(8.42,10.82)	154.84(136.61,173.67)	2.90(1.98,3.83)	2.02(1.20,2.85)
Cyprus	135.04(61.55,197.05)	2111.07(1076.22,2962.53)	31.63(14.34,46.17)	398.34(188.78,570.62)	211.49(164.96,260.54)	2856.46(2327.23,3448.81)	15.32(11.33,18.55)	178.94(142.42,214.62)	-2.43(-2.84,-2.02)	-2.69(-3.02,-2.36)
Cuba	567.27(537.17,595.46)	12867.33(12225.54,13477.06)	5.86(5.53,6.15)	127.08(120.64,133.13)	3180.79(2781.49,3546.54)	57116.34(49971.56,64247.48)	15.12(13.26,16.86)	287.34(251.59,322.58)	3.58(3.36,3.81)	3.11(2.92,3.31)
Croatia	1501.09(1349.64,1660.10)	24438.53(22225.52,26892.45)	30.22(27.10,33.45)	456.85(414.45,503.51)	1350.19(1162.09,1533.92)	18757.17(16356.97,21219.47)	13.70(11.82,15.55)	199.27(174.34,226.15)	-1.50(-1.96,-1.03)	-1.78(-2.22,-1.33)
Côte d'Ivoire	917.79(519.78,1215.88)	25709.26(15199.52,34176.84)	30.66(17.58,39.33)	642.58(374.31,842.38)	2886.80(1776.07,4048.96)	78639.53(47399.16,110087.31)	32.60(21.12,44.59)	681.87(430.51,945.42)	0.15(-0.12,0.42)	0.14(-0.12,0.41)
Costa Rica	195.73(175.94,209.06)	3709.65(3428.26,3945.29)	12.23(10.93,13.08)	219.25(200.85,233.34)	533.44(453.02,603.96)	8665.48(7572.41,9652.47)	9.29(7.98,10.48)	155.28(135.92,172.87)	-1.92(-2.39,-1.45)	-2.12(-2.50,-1.73)
Cook Islands	11.52(9.39,14.23)	282.12(225.52,351.22)	108.54(88.45,132.45)	2273.52(1840.26,2821.90)	14.13(11.32,17.38)	296.67(236.74,369.78)	56.22(44.98,69.38)	1184.47(941.79,1490.08)	-2.15(-2.25,-2.05)	-2.08(-2.19,-1.96)
Congo	732.94(405.94,1058.22)	18141.86(9691.30,26664.80)	94.39(55.59,131.83)	1853.67(1063.88,2662.35)	1310.75(807.68,1868.10)	32015.20(19329.18,46581.05)	70.18(44.07,96.98)	1314.12(818.68,1858.92)	-1.14(-1.25,-1.04)	-1.34(-1.47,-1.22)
Comoros	89.35(45.64,133.32)	2221.05(1125.74,3371.75)	61.59(34.03,87.04)	1201.15(632.65,1773.75)	163.49(95.90,249.94)	3559.84(2129.44,5395.38)	42.76(25.39,65.79)	786.68(472.00,1190.04)	-1.40(-1.59,-1.21)	-1.63(-1.85,-1.41)
Colombia	4207.10(3939.62,4418.14)	84384.53(80250.51,88054.13)	29.19(27.16,30.81)	521.47(493.52,545.96)	4302.43(3508.59,5155.21)	71378.14(59366.63,85389.74)	7.49(6.14,8.98)	127.70(106.55,152.73)	-4.78(-5.00,-4.55)	-4.98(-5.25,-4.72)
China	232417.38(155170.90,276147.28)	4970286.12(3273656.78,5904184.63)	42.62(30.46,49.57)	715.81(488.37,842.83)	328079.61(224196.25,424637.69)	5588976.70(3974289.38,7176387.41)	18.85(12.86,24.40)	292.52(206.59,374.92)	-2.68(-3.06,-2.30)	-2.97(-3.37,-2.56)
Chile	1209.18(1138.72,1273.85)	22502.89(21438.88,23600.91)	14.11(13.18,14.91)	239.87(227.49,252.31)	3204.06(2762.47,3498.29)	47899.25(42333.52,51731.39)	12.08(10.44,13.17)	183.86(163.15,198.19)	-0.13(-0.42,0.17)	-0.47(-0.71,-0.24)
Chad	798.52(445.12,1096.05)	19000.21(10724.96,25534.97)	32.05(17.65,44.31)	682.12(383.70,919.72)	1665.38(895.38,2411.23)	43845.03(23603.20,65799.74)	34.84(19.24,49.82)	741.01(404.34,1070.76)	0.19(-0.08,0.47)	0.17(-0.11,0.46)
Central African Republic	653.45(243.98,999.73)	16982.99(6141.76,26511.35)	83.82(34.25,124.90)	1651.66(640.38,2484.65)	1057.53(436.48,1632.25)	27863.35(11726.12,44126.79)	74.98(32.33,112.92)	1434.15(624.19,2176.77)	-0.40(-0.44,-0.35)	-0.51(-0.56,-0.46)
Canada	613.94(551.65,664.19)	12290.73(11475.65,13048.36)	1.96(1.75,2.12)	38.71(36.20,40.97)	2220.74(1903.06,2429.35)	41471.71(37519.10,45024.57)	2.80(2.45,3.04)	61.41(56.81,66.20)	1.54(1.12,1.97)	1.94(1.53,2.36)
Cameroon	1299.12(652.51,1748.58)	33734.53(17802.61,45310.56)	35.54(17.86,47.65)	760.12(398.42,1016.88)	3236.42(1554.21,4762.09)	86670.08(42332.43,127957.34)	31.78(14.91,45.77)	669.05(330.65,976.54)	-0.42(-0.61,-0.22)	-0.47(-0.68,-0.26)
Cambodia	1571.66(846.25,2220.54)	39745.70(21203.58,55990.43)	42.67(23.74,59.50)	906.02(494.27,1268.63)	3153.57(1920.34,4197.59)	73404.49(45419.60,99112.22)	32.37(20.07,41.72)	631.18(389.87,828.51)	-0.91(-1.05,-0.76)	-1.21(-1.34,-1.08)
Cabo Verde	61.01(46.33,81.52)	1277.66(960.40,1666.32)	25.85(19.55,34.22)	557.73(418.04,730.08)	91.95(70.41,116.11)	1922.05(1502.32,2463.94)	21.96(16.70,27.59)	433.18(337.27,552.37)	-0.78(-1.09,-0.48)	-1.07(-1.32,-0.82)
Burundi	974.64(90.65,1557.37)	22957.24(2443.32,37014.91)	53.53(5.37,83.33)	1041.49(116.27,1648.03)	1296.68(644.74,1783.91)	31759.53(16663.42,43959.43)	38.38(18.78,53.37)	710.61(363.22,969.87)	-1.51(-1.68,-1.34)	-1.68(-1.86,-1.50)
Burkina Faso	1286.76(841.73,1768.93)	32227.21(21112.80,44508.87)	35.78(23.98,48.54)	760.77(503.86,1037.38)	3245.28(1812.88,4753.45)	77360.51(42793.91,113714.30)	42.58(24.36,60.74)	855.41(482.48,1235.33)	0.85(0.69,1.02)	0.62(0.50,0.74)
Bulgaria	3731.58(3353.66,4122.19)	80443.18(72485.25,88510.57)	39.40(35.47,43.40)	721.84(653.64,790.29)	14814.64(12743.23,16867.42)	245038.49(209858.26,280896.22)	103.42(89.56,117.24)	1739.46(1489.32,1992.26)	4.14(3.32,4.97)	3.73(2.96,4.51)
Brunei Darussalam	16.35(12.20,19.93)	359.18(266.21,436.88)	22.63(17.05,27.66)	368.78(279.64,447.68)	27.50(22.21,35.70)	622.67(507.58,809.17)	14.39(11.49,17.80)	223.19(181.68,283.97)	-0.95(-1.24,-0.66)	-1.32(-1.56,-1.08)
Brazil	17015.93(15980.31,17677.96)	393957.63(377694.23,406004.75)	23.22(21.24,24.34)	457.81(433.60,473.56)	29424.09(25841.14,32161.49)	575012.25(522169.99,624434.49)	12.26(10.70,13.41)	232.62(210.90,252.78)	-1.86(-2.00,-1.73)	-2.09(-2.22,-1.96)
Botswana	240.92(173.50,325.02)	5903.38(4223.79,7958.01)	60.47(44.21,81.16)	1159.47(841.11,1552.17)	481.33(369.24,643.66)	10966.94(8273.08,15227.30)	44.83(34.17,57.82)	823.04(635.58,1102.61)	-0.71(-0.99,-0.44)	-0.91(-1.19,-0.64)
Bosnia and Herzegovina	456.41(366.42,586.51)	9549.29(7611.00,12237.14)	13.89(10.98,18.03)	257.59(207.23,328.90)	909.64(619.29,1220.58)	14528.93(10217.03,19019.12)	14.22(9.68,19.11)	228.60(159.92,298.92)	0.40(0.20,0.59)	-0.13(-0.32,0.07)
Bolivia (Plurinational State of)	500.83(214.00,737.83)	11060.04(4857.11,16202.39)	20.26(9.28,29.09)	370.66(165.75,535.79)	1092.80(601.66,1572.62)	22142.51(12670.73,31669.24)	15.19(8.46,21.60)	266.35(155.03,378.10)	-0.85(-0.91,-0.80)	-1.06(-1.12,-1.01)
Bhutan	40.63(20.48,59.52)	967.41(505.50,1394.24)	24.23(11.91,36.10)	452.21(234.06,660.28)	99.22(66.69,127.48)	1823.76(1219.04,2379.37)	18.72(12.55,24.15)	318.98(215.12,413.25)	-0.87(-0.93,-0.81)	-1.19(-1.25,-1.14)
Bermuda	5.76(5.37,6.15)	114.24(107.40,121.86)	10.34(9.58,11.05)	190.08(178.26,202.56)	13.64(11.48,16.49)	226.93(194.26,275.26)	8.82(7.45,10.70)	160.71(138.38,195.12)	-0.11(-0.68,0.46)	-0.13(-0.70,0.45)
Benin	443.93(292.11,592.85)	10619.39(7041.54,13972.12)	24.98(16.55,32.92)	533.24(353.62,700.06)	1057.87(661.61,1422.76)	26649.84(16656.27,36408.43)	24.69(15.77,32.79)	510.32(324.86,678.65)	-0.00(-0.16,0.16)	-0.13(-0.28,0.02)
Belize	16.94(15.62,18.31)	360.27(336.62,388.45)	18.44(16.99,19.94)	381.19(355.98,411.28)	69.48(61.36,77.94)	1571.02(1391.05,1770.42)	26.05(22.89,29.18)	526.45(467.04,591.91)	1.62(1.34,1.90)	1.49(1.24,1.75)
Belgium	422.60(367.18,457.33)	6184.49(5535.54,6614.66)	2.76(2.38,2.99)	40.03(35.81,42.70)	699.86(534.44,803.87)	8581.96(6911.56,9560.22)	2.13(1.66,2.42)	29.76(24.75,32.70)	-0.95(-1.56,-0.34)	-1.00(-1.50,-0.50)
Belarus	590.85(481.40,720.04)	14149.94(11347.49,17140.42)	4.63(3.79,5.61)	109.22(87.74,131.83)	176.04(148.52,211.15)	3816.99(3168.36,4641.50)	1.10(0.93,1.33)	24.99(20.68,30.52)	-5.67(-6.78,-4.55)	-5.80(-6.95,-4.63)
Barbados	57.80(53.16,61.58)	1014.82(940.04,1079.53)	19.15(17.62,20.41)	346.63(323.59,367.17)	87.63(71.48,103.62)	1582.29(1294.37,1881.95)	16.99(13.84,20.09)	310.84(253.78,371.30)	0.20(0.03,0.37)	0.20(0.04,0.36)
Bangladesh	9776.44(6628.12,13963.52)	207986.41(138914.41,292906.97)	25.67(17.57,36.95)	473.65(320.07,666.65)	22460.76(13712.79,49028.09)	421439.87(262703.07,925380.61)	20.67(12.85,44.28)	339.95(212.08,739.23)	-0.76(-1.10,-0.42)	-1.02(-1.27,-0.78)
Bahrain	35.30(29.49,42.75)	826.14(691.55,996.28)	39.58(33.16,49.00)	640.47(537.06,776.57)	102.21(74.13,134.39)	2352.42(1731.85,3107.65)	25.68(19.58,32.23)	391.55(295.33,499.50)	-1.56(-1.88,-1.24)	-1.89(-2.12,-1.66)
Bahamas	79.14(72.98,85.05)	1901.63(1757.58,2047.72)	55.90(51.19,60.12)	1202.84(1116.40,1296.20)	225.00(184.26,274.78)	5184.19(4231.37,6468.59)	62.01(51.12,74.62)	1282.09(1054.08,1584.07)	0.54(0.26,0.82)	0.45(0.22,0.68)
Azerbaijan	1118.36(834.02,1501.99)	24074.36(18086.66,32688.16)	27.46(20.01,38.08)	515.71(385.51,692.72)	1611.37(1100.90,2247.06)	34515.46(23763.64,47737.40)	20.40(14.00,28.01)	375.67(261.99,519.73)	-0.48(-0.69,-0.27)	-0.76(-1.00,-0.52)
Austria	1235.26(1111.72,1320.38)	19355.94(17991.44,20520.71)	10.08(9.01,10.74)	159.30(148.53,168.54)	2842.28(2290.37,3153.92)	34132.08(28692.77,37489.40)	11.51(9.44,12.73)	151.49(129.48,165.35)	1.42(1.02,1.82)	0.69(0.35,1.03)
Australia	592.10(530.38,631.86)	9899.03(9114.16,10448.99)	3.33(2.93,3.58)	53.00(48.49,56.03)	1303.67(1077.71,1443.24)	19212.71(16809.57,21065.08)	2.38(1.99,2.63)	39.37(35.04,42.90)	-0.74(-1.19,-0.30)	-0.68(-1.14,-0.21)
Armenia	422.83(354.25,497.21)	7899.21(6708.21,9182.52)	19.18(16.02,22.48)	325.87(276.62,378.51)	649.22(523.76,804.35)	10623.80(8519.82,13542.34)	15.02(12.10,18.57)	245.32(196.15,313.25)	-0.47(-0.85,-0.09)	-0.54(-0.86,-0.21)
Argentina	5274.67(4895.22,5550.44)	100139.29(94754.91,104723.15)	17.92(16.55,18.92)	321.11(303.93,336.04)	8690.43(7645.99,9364.24)	132230.99(119795.91,140880.46)	14.77(13.02,15.91)	229.68(209.18,244.51)	-0.20(-0.39,-0.01)	-0.76(-0.93,-0.58)
Antigua and Barbuda	21.13(19.29,22.73)	385.04(357.01,411.45)	36.91(33.79,39.69)	705.91(653.45,755.25)	41.84(38.26,44.84)	826.33(767.22,889.78)	46.02(42.17,49.32)	819.59(759.63,879.41)	1.05(0.58,1.52)	0.82(0.35,1.30)
Angola	2253.83(1406.17,3123.45)	58238.12(34787.79,81549.94)	82.05(54.85,109.93)	1632.25(1050.69,2230.59)	4990.08(3324.69,6849.64)	120482.31(79730.81,169579.51)	64.47(44.19,85.41)	1178.44(796.03,1611.51)	-1.01(-1.10,-0.92)	-1.28(-1.36,-1.19)
Andorra	4.79(3.07,7.12)	81.03(52.56,117.84)	11.85(7.66,17.22)	169.70(110.42,246.00)	14.14(9.62,19.48)	180.43(128.42,242.05)	7.40(5.08,10.09)	103.03(73.12,138.94)	-1.09(-1.29,-0.90)	-1.22(-1.41,-1.03)
American Samoa	3.39(2.44,4.04)	93.63(68.93,113.95)	18.80(13.15,22.51)	407.58(295.92,484.49)	5.56(4.51,7.00)	142.43(115.13,177.84)	13.14(10.73,16.38)	293.36(236.27,366.21)	-1.37(-1.65,-1.08)	-1.28(-1.56,-1.00)
Algeria	4942.69(3285.83,6870.81)	107686.30(73894.88,151997.16)	66.05(44.12,87.78)	1079.83(731.85,1448.66)	12277.15(7943.75,16506.90)	230561.24(150682.67,311863.35)	50.61(33.44,67.41)	774.49(512.24,1028.24)	-0.41(-0.58,-0.23)	-0.78(-0.92,-0.65)
Albania	240.56(174.21,320.07)	4364.87(3175.87,5890.11)	14.92(10.85,19.79)	243.03(176.67,325.07)	430.61(290.46,635.01)	6784.44(4621.14,10043.27)	10.64(7.23,15.46)	160.45(109.87,234.99)	-0.66(-0.92,-0.41)	-0.90(-1.15,-0.65)
Afghanistan	5626.08(2518.28,9032.50)	131289.18(54600.72,214966.61)	100.14(48.46,155.85)	2001.13(884.67,3204.95)	5687.35(3053.76,8440.31)	139523.21(70615.54,213530.08)	78.18(44.17,114.26)	1499.91(799.81,2239.72)	-0.86(-1.00,-0.71)	-1.04(-1.20,-0.88)
High systolic blood pressure
Location	1990				2021				1990-2021
	Deaths (95% UI)	DALYs (95% UI)	ASMR/100,000 persons (95% UI)	ASDR/100,000 persons (95% UI)	Deaths (95% UI)	DALYs (95% UI)	ASMR/100,000 persons (95% UI)	ASDR/100,000 persons (95% UI)	EAPC of ASMR (95% CI)	EAPC of ASDR (95% CI)
Zimbabwe	409.83(285.63,577.90)	10573.13(7520.09,14322.73)	12.07(7.63,18.72)	261.99(183.01,371.58)	1405.26(878.69,2087.78)	38533.74(24148.04,57152.60)	23.98(14.67,36.18)	540.18(338.44,796.76)	3.00(2.44,3.56)	3.13(2.51,3.76)
Zambia	454.03(266.99,637.44)	12898.15(7525.10,17939.59)	18.38(10.73,26.58)	421.59(248.32,586.38)	1356.23(694.32,1993.80)	36650.07(18575.56,53881.02)	24.44(12.11,37.63)	512.88(267.16,749.03)	0.67(0.53,0.80)	0.31(0.17,0.46)
Yemen	1022.58(494.74,1568.38)	27134.12(13112.49,42123.90)	25.45(12.14,41.07)	552.43(270.79,848.11)	3613.85(1866.50,6084.72)	89228.43(45625.35,148663.58)	31.93(15.18,54.51)	643.38(336.39,1081.30)	0.56(0.36,0.75)	0.32(0.16,0.49)
Viet Nam	1452.86(795.51,2405.44)	35016.98(20915.61,56528.60)	3.94(2.07,6.81)	87.59(53.07,141.90)	4144.68(2207.97,6677.66)	100161.37(56888.20,161293.68)	4.69(2.41,7.93)	100.48(57.12,158.84)	0.87(0.65,1.08)	0.83(0.55,1.10)
Venezuela (Bolivarian Republic of)	1380.40(987.46,1788.44)	32345.03(26223.47,38694.40)	15.98(10.78,21.44)	334.77(256.40,411.60)	3354.05(1952.70,4864.43)	66934.89(47228.05,94252.27)	11.96(6.53,17.62)	228.02(157.99,323.83)	-1.30(-1.65,-0.96)	-1.65(-2.02,-1.28)
Vanuatu	6.77(4.08,10.14)	214.05(128.51,325.05)	11.54(6.63,17.17)	298.93(181.68,446.23)	20.83(14.09,28.54)	655.91(454.78,889.16)	12.44(7.97,17.10)	325.67(220.35,440.92)	0.18(0.13,0.24)	0.19(0.12,0.27)
Uzbekistan	786.16(499.21,1154.91)	19395.98(13075.14,27192.65)	7.27(4.54,10.84)	167.48(112.61,235.82)	2524.73(1715.67,3550.58)	63157.89(43476.35,88022.32)	11.34(7.19,16.28)	241.96(167.97,334.49)	1.69(1.43,1.95)	1.38(1.12,1.64)
Uruguay	176.94(113.27,238.33)	3451.19(2559.05,4321.88)	4.55(2.82,6.19)	88.86(66.18,110.88)	435.73(189.38,643.32)	6577.03(3978.14,8854.53)	6.47(3.34,9.17)	110.70(76.54,141.88)	1.05(0.92,1.18)	0.67(0.51,0.83)
United States Virgin Islands	11.77(8.45,15.80)	297.05(229.90,386.45)	17.00(10.55,24.20)	353.58(262.54,470.06)	16.44(9.72,24.11)	336.10(228.73,466.83)	9.75(5.48,14.34)	207.53(142.96,286.96)	-1.39(-1.55,-1.23)	-1.32(-1.48,-1.16)
United States of America	13299.11(8979.27,17356.04)	311355.17(248534.13,373660.51)	4.20(2.95,5.38)	103.83(84.32,122.70)	43430.80(27558.67,56335.19)	957209.81(758537.18,1146594.93)	7.44(5.13,9.40)	187.98(155.90,219.82)	2.09(1.94,2.25)	2.34(2.20,2.49)
United Republic of Tanzania	1404.37(616.79,2122.77)	36186.15(16351.50,52874.47)	15.94(6.21,25.71)	337.26(154.51,504.20)	3699.12(1539.67,5731.58)	87628.08(38263.54,131385.98)	18.12(7.00,29.89)	353.84(153.42,540.51)	0.41(0.34,0.49)	0.13(0.07,0.18)
United Kingdom	1520.19(990.54,2020.24)	30389.44(22953.98,37608.41)	1.65(1.10,2.16)	35.16(27.42,42.66)	2665.03(1392.69,3698.15)	47225.54(33275.57,59586.70)	1.86(1.10,2.48)	38.24(29.47,46.21)	0.96(0.77,1.14)	0.86(0.69,1.03)
United Arab Emirates	56.62(37.18,82.44)	1666.38(1160.24,2430.87)	18.07(9.85,28.25)	364.92(233.00,531.80)	345.93(245.57,461.74)	11290.29(8289.49,15157.51)	21.20(12.20,29.33)	369.47(251.20,491.63)	2.43(1.72,3.15)	1.57(1.00,2.15)
Ukraine	2269.88(1670.39,2889.81)	52563.99(41992.13,63286.02)	3.31(2.31,4.33)	74.42(59.10,89.52)	3329.98(2029.73,4839.85)	70685.47(48194.30,97015.91)	4.28(2.67,6.15)	94.41(64.64,128.57)	0.55(0.26,0.84)	0.52(0.25,0.80)
Uganda	465.14(138.42,775.22)	12567.09(4003.94,21083.10)	8.32(2.55,14.09)	188.89(60.26,307.97)	1186.31(447.10,1943.70)	32105.92(13247.89,51545.17)	9.71(3.49,17.74)	208.77(83.95,334.95)	0.02(-0.18,0.22)	-0.23(-0.46,-0.00)
Tuvalu	1.45(0.85,2.02)	43.22(24.71,60.45)	22.83(13.25,32.38)	601.11(352.28,835.25)	1.70(1.14,2.31)	47.04(32.27,62.70)	17.50(11.36,24.10)	437.90(297.01,591.49)	-0.83(-0.90,-0.76)	-0.99(-1.07,-0.92)
Turkmenistan	148.73(94.64,205.81)	3779.65(2609.96,5031.01)	8.68(5.15,12.50)	196.34(132.24,268.35)	406.43(260.79,611.30)	10119.92(6742.70,14958.15)	11.39(6.98,17.47)	249.52(162.64,374.88)	0.55(0.30,0.81)	0.50(0.24,0.75)
Türkiye	5354.84(2828.10,7865.62)	107445.73(65406.27,152464.01)	19.91(9.41,30.03)	345.20(202.00,500.01)	12263.66(6190.11,17882.91)	209593.22(132729.49,288110.67)	15.21(6.84,22.63)	241.80(145.20,339.30)	-0.60(-1.08,-0.12)	-1.06(-1.45,-0.68)
Tunisia	701.93(441.87,1022.10)	16379.95(10974.06,22966.04)	17.47(9.79,26.77)	343.37(226.14,492.06)	2471.21(1161.71,4552.36)	48994.87(24831.43,87022.07)	21.10(9.45,39.42)	385.35(194.06,684.24)	0.68(0.62,0.75)	0.43(0.37,0.48)
Trinidad and Tobago	139.34(99.24,181.40)	3274.76(2671.63,3899.27)	19.13(12.10,26.99)	398.18(308.59,493.52)	204.11(135.97,286.61)	4816.52(3580.32,6373.02)	10.90(7.07,15.42)	256.31(189.83,340.45)	-2.00(-2.29,-1.71)	-1.68(-1.97,-1.40)
Tonga	2.62(1.78,3.53)	73.92(52.75,98.80)	4.95(3.21,6.83)	126.53(89.67,168.94)	3.98(2.73,5.36)	100.05(71.35,133.31)	5.07(3.40,6.89)	122.06(87.26,162.51)	0.06(-0.10,0.23)	-0.15(-0.30,-0.00)
Tokelau	0.24(0.16,0.33)	6.08(4.00,8.51)	18.55(11.93,26.58)	467.94(309.28,654.69)	0.19(0.12,0.27)	4.70(3.13,6.60)	13.15(8.28,18.69)	322.83(214.51,453.87)	-1.20(-1.24,-1.16)	-1.32(-1.36,-1.27)
Togo	130.78(78.66,193.36)	3861.45(2360.65,5619.10)	11.49(6.63,18.04)	280.41(170.76,413.36)	569.81(294.03,873.91)	16525.81(8557.23,25165.71)	17.18(8.93,26.42)	395.40(211.24,602.52)	1.34(1.14,1.53)	1.15(0.95,1.35)
Timor-Leste	11.87(5.18,19.52)	355.75(156.23,572.57)	4.88(2.10,8.37)	113.72(49.79,187.24)	46.53(28.04,70.17)	1257.28(778.95,1911.46)	5.81(3.43,8.97)	141.89(88.63,212.25)	0.71(0.43,1.00)	0.87(0.56,1.17)
Thailand	363.48(224.64,521.28)	10252.72(6760.52,14175.74)	1.14(0.64,1.77)	27.14(17.74,37.87)	1440.93(889.56,2199.92)	33579.53(24021.17,46614.71)	1.33(0.82,2.04)	31.81(22.91,44.35)	0.13(-0.03,0.29)	0.12(-0.07,0.30)
Tajikistan	531.33(293.87,903.51)	11726.46(7766.96,17201.86)	21.74(11.24,38.73)	439.07(281.04,667.89)	769.06(482.32,1106.18)	18501.21(12149.82,26285.52)	17.72(9.29,26.41)	340.78(219.36,484.00)	-0.91(-1.33,-0.48)	-1.07(-1.44,-0.70)
Taiwan (Province of China)	892.96(634.69,1187.70)	20115.70(15276.72,24972.09)	7.18(4.30,10.67)	136.32(98.16,180.79)	2190.43(1051.45,3297.83)	41594.08(27875.70,54339.82)	4.92(2.52,7.23)	99.27(70.22,127.78)	-0.03(-0.87,0.82)	0.35(-0.56,1.26)
Syrian Arab Republic	1052.45(643.80,1461.84)	23820.91(16051.42,31946.62)	24.50(13.56,35.96)	468.53(308.28,630.82)	2327.29(1409.66,3440.17)	50017.99(33643.52,69782.72)	24.78(12.68,36.81)	429.61(262.54,614.01)	-0.42(-0.72,-0.11)	-0.77(-1.11,-0.43)
Switzerland	410.00(161.76,646.99)	5984.98(3325.73,8748.29)	3.62(1.51,5.63)	54.92(32.75,78.34)	1047.30(310.78,1785.23)	12448.90(5145.71,19790.96)	3.99(1.41,6.59)	54.32(26.10,81.52)	0.86(0.44,1.29)	0.46(0.11,0.81)
Sweden	140.75(62.33,220.46)	2270.51(1275.75,3279.44)	0.83(0.38,1.29)	14.12(8.56,19.74)	857.68(260.84,1415.63)	10978.35(4594.12,16746.15)	2.90(0.98,4.68)	41.57(19.93,60.42)	5.53(4.91,6.16)	4.99(4.39,5.59)
Suriname	24.71(17.30,33.59)	629.06(483.25,798.14)	10.15(6.82,14.29)	238.46(179.72,307.23)	62.12(40.50,90.72)	1546.19(1101.59,2100.35)	10.12(6.49,15.11)	240.71(171.15,326.63)	0.29(0.11,0.47)	0.23(0.05,0.42)
Sudan	2297.15(1175.86,3505.89)	57712.39(28530.59,88331.93)	28.50(14.76,43.33)	617.32(319.73,923.89)	4671.52(2628.50,7206.80)	114245.08(63211.51,172714.73)	28.70(15.27,44.64)	581.26(333.71,885.15)	0.04(-0.11,0.18)	-0.17(-0.31,-0.04)
Sri Lanka	767.66(532.63,1035.52)	20226.16(14713.88,26262.61)	8.00(4.98,11.58)	181.32(130.05,241.48)	1516.73(866.21,2671.16)	35027.66(20667.08,59216.94)	5.97(3.23,10.68)	130.50(77.75,221.27)	-1.11(-1.32,-0.91)	-1.33(-1.56,-1.10)
Spain	1371.00(630.89,2042.12)	21385.44(12827.10,29589.77)	2.65(1.13,4.02)	40.25(23.24,56.17)	5112.59(1503.75,8053.39)	62243.02(25397.50,92010.90)	3.52(1.26,5.37)	49.46(25.76,69.01)	1.08(0.90,1.26)	0.81(0.67,0.95)
South Sudan	213.58(99.34,343.82)	5644.87(2582.77,9093.06)	9.56(4.12,15.76)	215.46(100.97,347.61)	288.19(123.31,443.89)	8255.85(3545.82,12986.13)	8.73(3.58,13.77)	197.97(88.18,301.63)	-0.50(-0.87,-0.13)	-0.50(-0.89,-0.10)
South Africa	3538.83(2431.24,4874.70)	93259.97(74129.55,118417.10)	18.67(11.76,26.97)	425.86(326.62,555.64)	11033.56(7724.64,14190.00)	259860.16(206910.04,321624.27)	28.15(17.06,38.09)	569.58(422.84,712.96)	1.38(0.89,1.89)	1.02(0.54,1.50)
Somalia	362.69(158.52,572.63)	11743.92(4899.31,18856.19)	16.59(7.68,25.43)	406.58(185.25,640.04)	816.62(340.35,1322.70)	25321.80(10974.57,41438.62)	15.98(6.94,26.04)	368.41(166.02,567.92)	-0.12(-0.25,0.00)	-0.39(-0.53,-0.25)
Solomon Islands	13.62(6.61,20.94)	430.09(192.24,690.42)	10.38(5.38,15.86)	274.25(135.06,423.29)	36.37(21.52,54.99)	1162.60(693.36,1774.91)	10.63(6.08,15.89)	282.24(168.71,424.63)	0.10(0.05,0.15)	0.13(0.07,0.19)
Slovenia	222.65(133.12,299.08)	4210.71(3069.07,5230.54)	9.15(5.50,12.43)	171.39(125.12,214.40)	571.61(177.47,893.87)	7138.63(3096.08,10561.03)	9.83(3.49,15.10)	135.55(69.70,193.57)	0.94(0.63,1.25)	-0.24(-0.52,0.04)
Slovakia	383.41(239.47,597.58)	8111.97(5685.61,11809.68)	6.64(3.93,10.76)	137.44(95.03,201.50)	684.63(367.60,1023.19)	12555.61(8126.42,17694.81)	7.18(3.83,10.75)	132.58(86.26,186.50)	0.81(0.53,1.08)	0.36(0.07,0.65)
Singapore	81.10(56.95,109.36)	2139.68(1673.92,2695.07)	4.12(2.50,6.00)	90.65(67.37,117.70)	232.12(150.94,316.81)	5396.64(4263.63,6642.34)	2.73(1.75,3.78)	62.61(49.04,77.74)	-1.04(-1.45,-0.63)	-0.90(-1.32,-0.49)
Sierra Leone	167.93(97.45,247.93)	4426.27(2700.00,6381.54)	8.81(5.07,13.66)	209.85(125.03,301.85)	423.98(224.96,642.39)	12044.62(6280.42,17728.63)	12.06(6.27,18.47)	288.83(156.27,428.00)	1.11(0.84,1.38)	1.16(0.89,1.42)
Seychelles	18.60(13.38,24.78)	443.63(338.33,540.58)	33.01(23.64,44.20)	785.90(600.07,959.33)	29.73(20.55,39.75)	689.97(546.37,876.66)	28.42(18.31,39.92)	594.82(454.14,769.85)	-0.44(-0.61,-0.28)	-0.88(-1.05,-0.70)
Serbia	1408.53(782.28,2155.89)	26103.96(17492.40,37447.56)	17.64(8.58,27.89)	282.04(172.23,413.72)	2561.68(1257.55,3812.83)	39869.92(23996.37,55791.60)	14.76(7.16,22.04)	234.09(143.24,325.33)	-0.89(-1.08,-0.70)	-0.80(-0.96,-0.64)
Senegal	329.01(213.22,460.74)	9346.10(6093.42,13105.19)	10.84(6.96,15.62)	269.61(177.71,376.53)	1010.93(590.85,1458.41)	27540.87(17142.07,38646.64)	14.19(8.05,20.96)	332.99(203.21,469.65)	0.88(0.78,0.97)	0.72(0.61,0.82)
Saudi Arabia	1529.21(879.00,2358.38)	37962.41(22400.19,57394.81)	32.22(16.86,50.08)	650.11(380.00,993.40)	4582.14(2410.52,6871.66)	135582.10(73387.59,208491.90)	33.52(15.82,50.48)	661.34(359.51,975.85)	-0.07(-0.22,0.08)	-0.08(-0.22,0.07)
Sao Tome and Principe	4.70(3.29,6.21)	122.19(91.03,156.25)	7.75(5.21,10.55)	187.38(137.40,242.41)	9.17(6.32,12.66)	258.79(184.29,358.27)	9.20(5.89,13.23)	215.30(152.15,294.08)	0.43(0.30,0.56)	0.23(0.04,0.43)
San Marino	1.50(0.62,2.50)	22.01(11.75,34.10)	3.99(1.64,6.66)	60.06(32.76,92.04)	2.91(0.87,4.93)	38.33(16.60,60.61)	2.53(1.00,4.10)	41.00(21.78,63.73)	-0.34(-0.76,0.08)	-0.12(-0.49,0.25)
Samoa	15.85(10.45,21.17)	442.78(290.80,585.37)	19.88(12.46,27.84)	493.82(328.02,650.99)	23.29(15.13,31.19)	639.56(427.37,846.06)	17.16(10.82,23.51)	420.62(280.04,553.50)	-0.51(-0.64,-0.38)	-0.54(-0.69,-0.39)
Saint Vincent and the Grenadines	10.84(7.63,14.61)	248.94(191.44,312.55)	16.34(10.60,23.06)	354.94(267.59,449.44)	34.20(23.09,46.41)	772.25(604.70,966.53)	26.32(16.30,36.80)	558.16(425.97,705.61)	1.62(1.02,2.22)	1.55(0.98,2.12)
Saint Lucia	13.54(9.38,18.36)	305.28(240.01,378.90)	17.96(10.55,25.73)	365.70(277.28,464.93)	36.66(21.66,52.31)	768.26(573.21,998.67)	15.87(8.99,22.88)	322.64(236.46,418.56)	-0.23(-0.78,0.32)	-0.10(-0.62,0.43)
Saint Kitts and Nevis	4.84(3.41,6.33)	107.29(82.28,132.30)	13.46(8.90,17.93)	301.77(233.90,371.29)	9.74(6.87,12.71)	227.89(173.91,288.28)	17.10(10.07,23.31)	338.60(247.25,438.36)	1.81(1.32,2.29)	1.30(0.77,1.84)
Rwanda	452.36(101.96,717.00)	13149.16(2821.33,20604.90)	18.59(4.43,29.77)	433.38(100.37,680.74)	608.34(152.73,963.43)	15668.59(4282.93,23506.22)	12.44(3.35,21.62)	251.39(70.11,394.66)	-2.23(-2.62,-1.84)	-2.80(-3.22,-2.37)
Russian Federation	3658.81(2874.56,4376.22)	97219.61(81579.37,110768.75)	2.13(1.61,2.61)	54.30(45.44,62.08)	9038.34(5878.61,11707.91)	183315.52(139859.89,222963.17)	3.78(2.50,4.88)	78.14(60.34,94.07)	1.75(0.39,3.13)	0.76(-0.56,2.10)
Romania	5263.68(3559.00,6987.99)	105140.59(80450.03,130039.90)	21.67(12.79,30.33)	394.62(285.14,501.63)	8389.85(4041.02,11997.33)	135026.91(84590.33,177964.21)	20.39(10.44,28.56)	350.94(237.75,451.91)	0.44(0.05,0.83)	0.25(-0.13,0.62)
Republic of Moldova	115.87(92.42,138.58)	3220.10(2657.85,3764.36)	2.87(2.10,3.58)	72.33(59.26,85.17)	1174.19(765.44,1554.43)	21734.81(16139.42,27287.89)	19.39(12.75,25.69)	360.00(269.91,450.70)	7.24(6.81,7.68)	5.92(5.48,6.36)
Republic of Korea	885.03(487.18,1290.73)	21498.67(12661.70,29386.38)	4.46(1.90,7.27)	79.27(44.68,115.41)	1644.28(495.30,3077.89)	24234.05(11109.90,41022.97)	1.89(0.56,3.59)	27.47(12.46,46.46)	-2.71(-2.98,-2.44)	-3.41(-3.65,-3.16)
Qatar	10.60(7.23,14.02)	293.26(215.81,372.95)	18.31(9.56,26.81)	314.03(198.67,424.03)	40.10(26.78,57.83)	1228.03(878.37,1786.68)	9.18(4.68,13.45)	154.21(96.21,215.63)	-2.61(-3.21,-2.02)	-2.52(-3.01,-2.03)
Puerto Rico	258.31(183.23,329.81)	6061.54(4855.09,7207.27)	7.49(5.15,9.81)	170.33(135.60,203.81)	553.73(290.03,794.95)	10076.69(7150.31,13267.33)	6.61(4.23,8.99)	148.65(116.08,186.73)	-0.06(-0.43,0.31)	-0.14(-0.49,0.22)
Portugal	419.78(212.07,628.55)	6972.00(4427.12,9528.72)	3.57(1.50,5.62)	54.64(31.76,77.05)	1068.21(302.45,1749.10)	13514.31(5503.84,20437.87)	3.19(1.07,5.06)	45.92(23.75,65.77)	-0.30(-0.48,-0.12)	-0.44(-0.59,-0.28)
Poland	2959.28(2017.81,3845.21)	63955.15(49314.77,77981.53)	7.21(4.63,9.53)	149.64(116.13,183.83)	6179.62(3200.67,8565.13)	107121.39(71758.38,138898.21)	8.00(4.43,10.94)	148.20(103.98,189.19)	0.24(-0.05,0.53)	-0.06(-0.37,0.26)
Philippines	2459.33(1841.28,3168.32)	71259.97(54987.02,87457.46)	9.17(6.37,13.15)	220.10(167.78,280.47)	10203.18(7271.68,13304.31)	281426.59(211302.00,355909.39)	13.31(9.00,17.91)	321.32(234.10,411.39)	1.42(1.30,1.55)	1.40(1.27,1.53)
Peru	411.26(259.58,586.61)	9950.41(7240.93,12932.68)	3.69(2.16,5.42)	80.85(57.35,105.81)	861.88(459.65,1325.90)	18672.78(12800.49,26390.47)	2.56(1.37,3.92)	54.81(37.35,77.92)	-1.41(-1.72,-1.10)	-1.44(-1.75,-1.14)
Paraguay	168.74(109.69,236.85)	3839.87(2863.99,4983.74)	8.19(4.96,11.76)	171.72(123.27,224.09)	542.96(325.71,773.79)	11406.30(7967.95,15646.89)	10.02(5.70,14.42)	198.20(136.05,273.43)	0.94(0.82,1.07)	0.63(0.51,0.75)
Papua New Guinea	147.70(72.91,237.91)	4898.25(2360.48,7894.44)	8.00(4.12,12.76)	223.72(113.55,355.53)	397.80(216.68,669.88)	13384.81(7187.26,22305.67)	7.40(4.09,12.49)	207.21(115.01,349.31)	-0.31(-0.35,-0.28)	-0.31(-0.35,-0.27)
Panama	44.22(28.16,58.60)	924.08(694.30,1144.75)	3.24(1.92,4.38)	63.63(46.78,80.27)	222.21(119.40,313.66)	4050.79(2756.18,5322.26)	4.84(2.67,6.73)	90.46(61.98,118.45)	0.96(0.40,1.52)	0.78(0.25,1.30)
Palestine	222.89(128.63,344.18)	4630.26(2877.08,6943.76)	31.54(16.30,49.88)	572.30(347.31,864.12)	416.06(262.08,562.00)	8711.73(6235.30,11172.80)	24.12(12.35,34.76)	403.91(260.58,538.63)	-0.82(-1.03,-0.61)	-1.10(-1.25,-0.94)
Palau	0.57(0.41,0.78)	16.28(11.64,22.14)	6.36(4.39,8.88)	157.61(114.96,215.65)	1.09(0.79,1.44)	31.49(23.21,40.80)	5.54(3.81,7.60)	133.36(97.08,175.11)	-0.36(-0.42,-0.31)	-0.51(-0.56,-0.46)
Pakistan	2699.46(1438.71,4052.35)	65694.43(38073.86,94840.37)	5.48(2.84,8.53)	116.96(65.32,170.76)	8926.82(5743.03,13253.57)	227920.22(152006.47,326158.74)	8.93(5.27,13.88)	185.96(121.14,272.14)	1.49(1.16,1.82)	1.40(1.05,1.75)
Oman	122.03(76.89,194.15)	3192.47(2054.43,4767.61)	21.46(12.17,34.92)	456.92(293.08,717.54)	370.20(246.74,502.60)	9309.20(6343.67,12707.50)	26.71(15.22,37.67)	498.82(333.96,675.71)	1.60(1.08,2.12)	1.11(0.72,1.50)
Norway	89.18(41.98,135.86)	1393.61(869.46,1938.51)	1.17(0.57,1.76)	19.45(12.77,26.28)	116.22(40.31,191.78)	1531.75(719.85,2310.02)	0.90(0.34,1.45)	13.21(7.13,19.13)	-0.41(-1.00,0.19)	-0.82(-1.42,-0.21)
Northern Mariana Islands	0.78(0.54,1.07)	27.20(18.61,37.62)	4.76(3.07,6.65)	118.00(81.21,159.46)	2.02(1.53,2.45)	56.91(44.68,67.66)	4.47(2.88,5.83)	103.33(79.20,126.22)	-0.12(-0.26,0.02)	-0.30(-0.41,-0.18)
North Macedonia	312.67(179.93,458.70)	5847.07(3853.31,8001.20)	19.90(10.62,30.15)	343.38(213.57,483.49)	570.91(327.04,873.68)	10077.32(6468.77,14803.34)	25.01(10.33,40.14)	368.00(205.71,552.64)	0.89(0.45,1.34)	0.44(0.09,0.79)
Niue	0.36(0.22,0.51)	8.41(5.54,11.62)	15.97(10.06,22.37)	391.99(260.55,539.92)	0.30(0.20,0.42)	7.41(4.94,9.86)	14.57(9.22,20.04)	347.48(232.57,463.35)	-0.47(-0.52,-0.42)	-0.60(-0.66,-0.54)
Nigeria	4639.33(2829.19,7000.66)	116968.32(77723.62,168839.00)	12.04(6.91,18.32)	261.91(167.51,388.15)	9083.50(5167.47,13060.77)	241906.93(131764.78,341699.54)	11.76(6.60,17.55)	254.16(146.87,359.53)	-0.51(-0.74,-0.28)	-0.51(-0.74,-0.28)
Niger	223.15(76.82,358.84)	6618.55(2410.90,10534.59)	9.05(2.87,15.23)	218.02(77.50,350.87)	703.96(232.33,1138.96)	20255.53(7135.43,32318.99)	9.35(3.07,15.41)	226.05(76.82,358.20)	-0.02(-0.19,0.15)	-0.02(-0.18,0.14)
Nicaragua	88.69(58.11,120.73)	2055.80(1566.65,2617.59)	6.69(4.00,9.51)	135.70(97.05,176.54)	249.01(154.76,356.35)	5342.24(3902.97,7223.58)	5.91(3.37,8.61)	114.12(80.32,155.69)	-0.46(-0.66,-0.26)	-0.69(-0.85,-0.52)
New Zealand	76.49(48.86,105.33)	1558.93(1178.41,1926.58)	2.05(1.25,2.89)	41.07(30.97,51.39)	109.70(50.49,160.64)	1835.79(1198.85,2408.22)	1.19(0.60,1.70)	21.80(15.27,27.72)	-2.12(-2.46,-1.78)	-2.48(-2.90,-2.07)
Netherlands	210.48(106.46,315.29)	3550.48(2343.34,4821.97)	1.04(0.52,1.56)	17.69(11.80,23.84)	570.80(177.05,926.06)	7543.75(3489.89,11293.20)	1.39(0.46,2.22)	19.59(10.00,28.49)	1.37(1.07,1.67)	0.80(0.52,1.07)
Nepal	257.02(129.10,409.52)	7484.39(3712.38,11670.55)	2.97(1.46,4.92)	73.40(37.09,116.24)	943.85(615.15,1382.78)	24421.68(16470.58,35024.51)	4.48(2.77,6.94)	102.71(68.67,147.04)	1.64(1.22,2.06)	1.40(0.98,1.82)
Nauru	1.09(0.52,1.59)	35.54(16.68,51.97)	23.76(11.59,35.25)	646.11(305.64,942.13)	1.23(0.61,1.83)	39.03(19.13,57.82)	22.32(11.34,33.87)	581.64(284.42,863.54)	-0.31(-0.58,-0.04)	-0.45(-0.73,-0.17)
Namibia	123.19(80.96,174.24)	3227.81(2250.11,4424.98)	23.79(13.65,36.44)	509.16(332.71,721.10)	345.77(215.53,509.32)	8287.69(5440.78,12054.99)	32.17(18.00,49.60)	631.26(398.28,920.96)	0.79(0.44,1.15)	0.44(0.05,0.83)
Myanmar	2116.17(772.66,3417.17)	62317.13(23290.62,100476.64)	9.49(3.44,15.29)	247.55(91.61,397.88)	3566.96(1747.45,5467.19)	96445.65(49984.29,146390.85)	7.70(3.61,12.09)	187.96(95.84,286.12)	-1.03(-1.15,-0.90)	-1.24(-1.38,-1.11)
Mozambique	741.18(408.49,1068.72)	20179.95(11621.58,29030.97)	14.87(8.03,21.87)	328.29(181.94,475.07)	2046.61(1150.50,3209.50)	57204.98(32844.17,88434.60)	22.43(11.81,37.13)	487.20(276.82,751.69)	1.78(1.58,1.99)	1.72(1.52,1.92)
Morocco	2789.34(1466.75,4249.27)	65049.17(34160.65,97080.92)	21.98(11.61,34.85)	459.95(244.42,687.37)	7418.12(4275.50,11151.41)	162263.70(92589.95,239538.12)	25.18(13.48,39.38)	489.60(286.75,725.69)	0.71(0.56,0.87)	0.44(0.30,0.58)
Montenegro	28.68(16.48,41.82)	576.82(391.74,805.61)	4.96(2.71,7.34)	94.67(63.42,133.17)	64.03(35.06,96.65)	1117.20(726.93,1663.06)	7.56(3.79,11.73)	121.75(75.15,179.32)	1.52(1.31,1.73)	0.92(0.84,1.01)
Mongolia	61.15(36.12,93.20)	1451.73(873.86,2124.17)	6.40(3.70,10.06)	140.02(84.12,206.58)	82.27(50.76,124.75)	2081.42(1365.95,3037.56)	4.49(2.40,7.17)	92.13(57.69,136.41)	-1.68(-1.93,-1.42)	-1.85(-2.12,-1.58)
Monaco	2.47(0.96,4.22)	36.99(20.25,59.25)	3.02(1.30,5.03)	49.90(30.22,77.15)	4.71(1.60,7.81)	64.09(30.96,98.73)	3.67(1.49,5.98)	58.00(32.61,84.69)	0.83(0.39,1.29)	0.69(0.26,1.11)
Micronesia (Federated States of)	11.13(6.35,15.71)	324.98(186.70,461.80)	24.01(13.67,33.73)	629.33(359.42,889.36)	14.63(9.25,20.47)	443.89(278.13,618.04)	21.38(12.92,29.61)	540.42(344.13,744.75)	-0.43(-0.46,-0.39)	-0.55(-0.58,-0.51)
Mexico	2051.42(1258.35,2842.34)	42337.80(31987.75,53009.73)	6.13(3.21,8.95)	108.14(75.04,142.49)	5058.65(2918.50,6925.77)	97360.53(66872.97,128508.42)	4.50(2.39,6.26)	80.47(53.12,107.55)	-0.77(-1.06,-0.48)	-0.78(-1.09,-0.46)
Mauritius	109.36(83.50,136.77)	2879.27(2295.32,3450.68)	16.22(11.70,21.52)	380.65(298.86,469.08)	217.83(151.44,291.07)	4880.94(3902.56,5954.46)	12.73(8.26,17.58)	275.63(217.10,342.22)	-0.49(-1.16,0.17)	-0.78(-1.48,-0.07)
Mauritania	204.19(116.22,306.81)	5272.41(3043.57,7794.31)	22.05(12.25,33.48)	513.50(294.87,760.34)	412.04(230.90,654.96)	10258.32(6009.74,16658.03)	21.39(11.12,34.38)	465.29(268.67,744.76)	-0.26(-0.36,-0.17)	-0.49(-0.58,-0.39)
Marshall Islands	3.38(2.10,4.80)	100.49(60.77,143.56)	22.75(13.53,32.93)	567.97(355.36,808.47)	6.79(4.10,9.91)	217.87(128.75,321.69)	21.05(12.69,30.30)	534.88(322.78,768.21)	-0.35(-0.44,-0.25)	-0.29(-0.41,-0.17)
Malta	10.46(5.75,15.05)	184.69(127.86,244.75)	2.76(1.36,4.12)	45.49(29.73,61.41)	30.92(12.47,47.28)	453.29(248.05,631.14)	2.69(1.17,4.03)	43.82(26.81,59.08)	0.65(0.33,0.97)	0.62(0.34,0.91)
Mali	390.93(144.84,602.80)	11458.98(4183.65,17582.61)	10.53(3.99,16.41)	264.53(101.44,404.49)	850.74(373.20,1301.54)	25756.63(11385.34,39188.80)	10.15(4.41,15.68)	255.45(115.88,385.24)	-0.16(-0.23,-0.09)	-0.16(-0.22,-0.09)
Maldives	4.16(1.42,6.66)	127.71(42.18,202.86)	4.78(1.64,7.95)	124.45(43.62,198.92)	9.14(6.32,13.47)	254.34(188.74,342.02)	2.93(1.86,4.46)	67.43(48.30,93.97)	-1.90(-2.13,-1.68)	-2.32(-2.55,-2.09)
Malaysia	271.01(173.13,368.86)	7302.63(4874.12,9503.64)	3.07(1.88,4.29)	74.94(49.46,98.69)	690.58(495.54,911.70)	17351.52(13119.30,21579.52)	2.65(1.75,3.73)	60.16(44.76,76.29)	-1.13(-1.44,-0.81)	-1.32(-1.62,-1.02)
Malawi	300.41(130.64,463.68)	8552.80(3645.54,13330.40)	9.42(3.95,15.21)	212.26(94.88,325.72)	794.47(410.06,1166.48)	22161.87(11797.25,32596.48)	12.76(6.40,19.95)	280.95(150.50,410.59)	0.75(0.60,0.91)	0.62(0.45,0.79)
Madagascar	856.79(525.87,1254.78)	23417.87(14193.25,33364.51)	19.08(11.47,29.87)	439.07(268.65,637.95)	2457.14(1517.38,3652.99)	71253.28(42697.04,104949.02)	27.12(15.71,41.70)	592.02(375.91,866.64)	1.05(0.97,1.12)	0.87(0.79,0.95)
Luxembourg	14.21(6.66,21.53)	230.15(145.10,319.35)	2.82(1.24,4.32)	43.75(26.16,60.94)	34.84(11.67,54.08)	460.76(227.96,664.02)	2.70(1.01,4.10)	38.61(21.12,54.35)	0.35(0.11,0.60)	0.11(-0.13,0.34)
Lithuania	86.14(61.89,110.30)	2136.89(1654.59,2597.76)	1.94(1.38,2.49)	48.11(37.11,58.46)	409.61(228.76,560.09)	7220.85(5109.86,9139.24)	6.41(4.07,8.41)	127.75(96.09,160.59)	4.87(4.16,5.58)	4.00(3.25,4.76)
Libya	252.78(137.15,390.91)	5920.22(3344.64,9189.34)	14.91(7.88,23.52)	310.57(175.40,476.10)	1036.27(555.14,1609.54)	24361.94(13751.42,38589.48)	23.79(12.04,37.29)	471.02(260.00,729.20)	2.00(1.83,2.16)	1.69(1.55,1.83)
Liberia	165.02(100.65,236.46)	4556.30(2831.51,6396.49)	15.07(9.15,22.03)	375.89(234.69,533.42)	415.13(222.94,632.71)	12525.57(6882.90,18842.37)	20.92(11.06,32.76)	503.34(274.68,757.18)	0.99(0.83,1.14)	0.85(0.70,1.01)
Lesotho	188.98(119.47,268.42)	4399.03(2890.49,6108.48)	25.64(15.52,39.17)	532.98(350.15,748.32)	388.81(204.21,567.44)	9962.03(5290.51,14646.35)	43.12(21.12,64.86)	932.26(490.14,1361.03)	2.57(2.04,3.10)	2.69(2.14,3.24)
Lebanon	281.08(106.45,469.32)	6251.67(2387.12,9907.66)	15.71(5.72,27.24)	304.81(117.82,493.96)	491.85(236.04,728.79)	8212.64(5189.00,11212.50)	7.38(3.82,10.77)	129.90(86.09,173.96)	-2.77(-2.96,-2.58)	-3.07(-3.30,-2.85)
Latvia	59.54(43.72,74.30)	1544.84(1230.87,1832.11)	1.71(1.25,2.13)	44.50(35.74,52.58)	529.44(272.72,733.53)	8740.13(5707.94,11284.64)	11.67(6.73,15.63)	216.24(157.87,267.10)	8.46(7.18,9.76)	6.79(5.60,7.99)
Lao People's Democratic Republic	212.44(74.41,347.56)	6040.99(2063.60,9942.95)	11.12(3.92,19.27)	274.51(98.34,453.73)	432.94(246.77,623.15)	12188.41(7005.65,17179.90)	10.27(5.73,15.24)	243.06(140.67,342.51)	-0.27(-0.34,-0.21)	-0.36(-0.40,-0.33)
Kyrgyzstan	164.96(118.88,214.69)	4113.57(3215.51,5017.00)	5.92(4.11,7.95)	137.70(106.34,169.17)	422.44(299.74,552.50)	10215.81(8006.78,12828.05)	10.21(6.70,13.68)	214.81(164.14,273.56)	1.39(1.00,1.77)	1.01(0.68,1.34)
Kuwait	107.67(81.61,134.15)	2939.48(2467.21,3442.49)	22.71(14.35,30.72)	461.90(355.41,570.72)	247.00(140.86,356.28)	5417.89(3972.15,7191.90)	11.22(5.77,16.40)	196.80(129.64,273.79)	-2.16(-2.51,-1.81)	-2.65(-3.00,-2.29)
Kiribati	3.18(2.09,4.11)	101.87(66.50,129.92)	8.65(5.64,11.62)	240.57(158.43,311.83)	6.15(4.03,8.34)	193.75(127.13,264.31)	9.00(5.61,12.22)	234.11(154.43,313.76)	0.09(0.07,0.11)	-0.14(-0.17,-0.12)
Kenya	643.22(408.44,915.33)	16971.20(11497.43,23074.56)	9.04(5.35,13.81)	198.80(131.06,277.31)	2509.12(1517.55,3508.49)	65298.19(43060.45,87437.75)	14.10(7.37,21.83)	286.37(175.82,398.55)	1.90(1.72,2.08)	1.58(1.42,1.74)
Kazakhstan	637.10(494.91,781.16)	16998.10(13847.15,20172.62)	5.31(3.87,6.63)	130.96(106.95,156.00)	780.17(545.37,1031.09)	18663.59(14353.99,24394.43)	5.25(3.34,7.14)	107.38(79.59,140.22)	-1.13(-2.88,0.65)	-1.87(-3.65,-0.05)
Jordan	333.96(224.67,456.78)	8221.46(5851.60,11003.99)	32.55(18.83,46.57)	645.69(442.13,873.01)	1295.51(857.93,1723.27)	29545.10(21782.03,37672.43)	24.41(13.70,34.49)	441.04(297.66,576.11)	-1.04(-1.25,-0.82)	-1.39(-1.62,-1.16)
Japan	3691.34(1741.98,5851.18)	64151.10(40601.20,91065.65)	2.53(1.03,4.17)	41.05(24.36,59.93)	4835.84(1439.78,8577.87)	63562.97(28397.78,102206.93)	0.84(0.36,1.35)	15.53(10.15,21.43)	-3.14(-4.11,-2.17)	-2.91(-3.79,-2.02)
Jamaica	324.98(205.57,453.39)	6604.02(5005.91,8462.49)	17.74(11.51,24.49)	370.14(284.20,466.52)	574.72(361.41,810.41)	12353.78(8936.19,16461.24)	17.39(11.35,24.15)	392.20(284.14,527.44)	0.87(0.15,1.60)	0.96(0.34,1.59)
Italy	5033.24(2525.09,7599.29)	81839.32(52234.89,111995.33)	5.76(2.73,8.83)	91.49(57.05,125.70)	15576.89(4617.11,25733.50)	188763.56(74349.47,288894.20)	7.32(2.57,11.66)	101.33(50.64,144.00)	0.95(0.82,1.07)	0.41(0.29,0.53)
Israel	116.27(63.11,167.53)	1980.52(1337.28,2684.08)	2.62(1.29,3.90)	42.12(26.77,57.36)	177.19(66.91,276.73)	2532.91(1370.73,3622.17)	1.22(0.50,1.86)	18.97(11.24,26.23)	-2.52(-3.32,-1.72)	-2.52(-3.28,-1.74)
Ireland	60.27(30.76,87.71)	1009.67(673.42,1349.98)	1.61(0.75,2.43)	25.69(15.95,34.84)	97.45(38.32,150.78)	1454.66(799.52,2035.86)	1.13(0.46,1.74)	17.78(10.26,24.43)	-0.11(-0.38,0.15)	-0.27(-0.53,-0.01)
Iraq	1562.49(859.01,2245.67)	35579.04(20653.43,50515.00)	21.25(11.52,31.00)	446.70(258.18,630.79)	3614.86(2330.52,4922.86)	81875.79(57550.96,110031.73)	20.54(11.11,28.94)	375.81(246.43,509.09)	-0.66(-0.84,-0.49)	-1.06(-1.21,-0.90)
Iran (Islamic Republic of)	3215.59(2327.62,4402.67)	81781.34(61268.68,108317.41)	16.20(9.72,24.60)	327.60(236.86,453.71)	10993.90(6670.73,14833.62)	225779.11(172035.77,277482.39)	16.48(9.17,22.89)	304.65(218.62,388.26)	0.43(0.26,0.61)	0.15(-0.03,0.32)
Indonesia	5476.34(2814.59,8193.54)	162632.81(86300.63,233137.35)	5.96(2.95,9.28)	149.87(78.02,221.57)	19834.34(11646.74,28219.97)	551509.96(335102.98,755838.53)	9.29(5.22,13.91)	216.25(129.28,304.59)	1.55(1.41,1.68)	1.31(1.14,1.47)
India	10367.05(5646.25,15882.56)	289985.47(160729.01,430766.97)	2.61(1.33,4.35)	60.29(33.67,92.22)	45930.80(29768.00,67057.33)	1106653.94(761712.74,1570791.61)	4.35(2.56,6.74)	93.42(63.88,132.15)	1.89(1.74,2.05)	1.57(1.48,1.67)
Iceland	4.91(2.28,7.30)	76.96(47.11,104.90)	1.59(0.78,2.34)	26.06(16.75,35.10)	12.20(4.45,18.92)	160.94(85.21,230.92)	1.68(0.70,2.53)	24.81(14.56,34.72)	1.11(0.75,1.46)	0.71(0.41,1.01)
Hungary	2288.34(1478.43,3026.19)	45298.25(34434.01,55523.97)	16.68(9.91,22.57)	316.77(236.73,389.90)	3598.35(1969.21,4964.83)	61055.72(42676.68,77477.61)	16.90(9.68,22.93)	310.20(229.91,384.36)	1.03(0.53,1.54)	0.77(0.29,1.26)
Honduras	201.62(141.24,296.55)	5180.11(3923.75,6970.26)	11.36(7.02,17.91)	248.90(181.90,353.06)	874.90(598.30,1242.79)	20049.41(14777.97,27202.26)	16.44(9.86,25.21)	326.55(235.11,450.74)	1.34(1.14,1.53)	1.02(0.87,1.16)
Haiti	298.06(107.56,513.77)	8732.94(3174.96,14818.93)	10.09(3.78,17.51)	249.46(91.48,427.27)	785.95(352.49,1290.57)	23041.35(10227.29,37306.18)	11.87(5.03,20.65)	286.98(130.74,467.14)	0.64(0.58,0.70)	0.60(0.53,0.66)
Guyana	126.41(95.12,162.02)	3264.03(2609.26,3926.67)	36.07(25.43,47.33)	829.44(639.85,1034.87)	198.92(143.86,265.50)	5320.75(3965.39,7087.39)	33.71(23.00,46.64)	794.66(576.88,1060.21)	0.43(0.05,0.80)	0.56(0.14,0.97)
Guinea-Bissau	61.55(29.12,96.01)	1881.39(857.41,2890.87)	16.22(7.69,25.92)	423.62(199.53,651.63)	143.33(68.89,221.39)	4546.77(2223.59,6949.80)	21.16(10.06,33.13)	525.19(257.42,810.74)	0.84(0.65,1.03)	0.67(0.48,0.86)
Guinea	343.22(176.82,520.03)	9315.72(4882.11,14213.27)	10.80(5.51,16.81)	270.08(142.18,407.76)	725.54(387.41,1068.47)	20343.11(10986.38,30224.77)	13.66(7.34,20.98)	330.78(177.17,481.93)	0.77(0.57,0.97)	0.65(0.47,0.84)
Guatemala	104.07(77.30,129.93)	2625.15(2213.31,3086.68)	4.10(2.45,5.60)	80.06(60.12,98.89)	240.22(142.69,333.91)	4776.85(3490.67,6113.64)	2.68(1.38,3.81)	46.77(31.47,61.39)	-0.76(-1.27,-0.25)	-1.28(-1.81,-0.74)
Guam	14.98(9.26,19.40)	427.25(273.35,536.51)	23.59(13.21,32.99)	529.34(326.25,687.17)	14.47(11.06,22.20)	422.88(334.06,613.90)	6.85(5.25,10.48)	207.24(164.56,300.50)	-3.91(-4.58,-3.23)	-2.99(-3.63,-2.35)
Grenada	8.42(5.78,11.30)	192.06(148.35,237.78)	11.47(8.47,14.82)	284.07(224.11,344.96)	17.83(12.76,22.50)	421.05(338.89,501.42)	17.43(11.71,23.22)	371.21(286.67,452.73)	1.86(1.59,2.13)	1.43(1.09,1.77)
Greenland	1.90(1.45,2.48)	62.79(49.02,80.05)	6.14(3.96,8.57)	151.74(115.33,197.85)	2.33(1.72,3.01)	69.53(52.10,89.29)	3.78(2.52,5.12)	99.37(73.88,126.86)	-1.30(-1.53,-1.07)	-1.06(-1.32,-0.81)
Greece	493.72(230.29,753.03)	7806.51(4683.09,10902.23)	3.58(1.51,5.61)	53.98(31.28,76.47)	1697.65(527.47,2663.64)	20968.87(8966.59,30952.20)	4.92(1.93,7.37)	71.42(41.05,97.73)	1.76(1.19,2.34)	1.67(1.11,2.23)
Ghana	728.23(444.20,1061.73)	22560.48(13844.21,31536.27)	12.14(7.58,18.31)	314.69(195.30,453.43)	2344.78(1392.02,3343.67)	66851.88(40176.36,92699.84)	15.77(9.06,23.46)	366.62(221.46,517.49)	0.55(0.30,0.80)	0.21(-0.04,0.46)
Germany	10032.32(5080.69,14664.39)	169390.65(108702.68,224681.87)	7.54(3.89,10.97)	131.46(89.98,170.59)	15952.62(4782.68,25532.23)	198362.96(78567.00,294689.41)	6.21(2.14,9.66)	85.13(42.50,119.89)	0.49(0.10,0.88)	-0.25(-0.61,0.10)
Georgia	407.28(292.70,549.34)	9615.77(7376.67,12543.24)	6.93(4.81,9.48)	156.12(119.20,204.47)	1526.10(775.50,2158.70)	26247.29(17349.47,34303.66)	23.52(13.24,32.44)	434.00(309.91,555.50)	6.67(5.31,8.04)	5.52(4.29,6.77)
Gambia	38.20(24.07,55.26)	1105.00(698.97,1592.92)	11.86(7.02,17.99)	288.71(183.13,415.47)	166.71(91.95,248.93)	4669.56(2717.57,6835.08)	18.30(9.88,27.85)	435.11(247.71,638.75)	1.26(1.05,1.46)	1.15(0.91,1.38)
Gabon	165.73(95.37,243.14)	3943.86(2294.40,5697.26)	32.80(17.70,49.79)	702.10(401.54,1018.62)	287.38(162.18,451.35)	6903.06(4057.43,10505.17)	35.02(18.98,58.78)	691.05(395.41,1079.35)	0.06(-0.11,0.22)	-0.23(-0.42,-0.05)
France	2383.71(892.41,3846.43)	36886.41(19298.63,55235.45)	2.69(1.05,4.27)	42.74(23.91,62.48)	4384.11(1239.38,7303.41)	58325.60(23942.71,90870.98)	2.00(0.70,3.18)	32.28(17.86,46.61)	-0.86(-1.02,-0.70)	-0.83(-0.95,-0.70)
Finland	217.14(121.47,314.55)	3867.55(2660.90,5139.05)	3.04(1.66,4.43)	54.42(37.45,72.14)	1057.15(376.52,1635.49)	14387.34(7302.38,20370.10)	6.49(2.76,9.65)	103.06(61.97,137.64)	3.60(2.84,4.36)	3.33(2.66,4.01)
Fiji	57.94(43.68,75.50)	1765.62(1351.49,2279.01)	17.73(12.32,24.05)	434.73(327.82,564.77)	108.60(78.50,145.28)	2967.04(2140.68,4005.66)	16.60(10.87,22.68)	376.47(272.84,503.69)	-0.50(-0.68,-0.32)	-0.67(-0.80,-0.55)
Ethiopia	2414.39(1179.14,3457.09)	72523.83(33372.66,105387.99)	13.91(7.08,20.64)	336.22(171.30,486.87)	2888.45(1829.40,4284.73)	76753.78(52643.87,110255.48)	7.54(4.35,12.04)	167.65(109.45,244.03)	-2.55(-2.77,-2.33)	-2.88(-3.11,-2.65)
Eswatini	81.58(50.30,111.90)	2072.30(1278.16,2758.81)	36.14(20.35,52.03)	740.46(458.08,1018.61)	189.83(98.52,289.05)	5083.70(2629.16,7926.90)	42.48(22.43,64.28)	906.55(483.63,1372.17)	0.99(0.51,1.46)	1.05(0.50,1.60)
Estonia	132.99(97.00,165.54)	3594.98(2859.58,4285.91)	6.72(4.86,8.42)	182.32(146.17,217.51)	1273.33(550.56,1845.48)	18481.22(10965.29,25065.08)	38.87(19.96,54.60)	631.73(413.55,825.35)	8.19(7.04,9.35)	5.88(4.88,6.90)
Eritrea	128.23(54.10,199.42)	4034.64(1620.14,6344.16)	13.87(6.27,21.98)	323.37(145.70,498.41)	307.09(168.09,453.97)	8760.22(4862.87,13257.30)	14.36(7.24,23.70)	306.46(165.12,452.80)	0.09(-0.03,0.21)	-0.20(-0.34,-0.06)
Equatorial Guinea	49.39(25.70,78.99)	1375.91(702.04,2211.49)	28.87(15.70,45.88)	679.97(357.64,1082.97)	102.83(52.66,170.17)	2644.80(1434.39,4272.23)	25.79(12.44,46.01)	524.48(272.37,864.79)	-0.65(-0.97,-0.32)	-1.17(-1.51,-0.83)
El Salvador	103.64(68.30,144.11)	2311.50(1759.37,2940.21)	3.65(2.30,5.12)	77.65(57.79,100.21)	206.53(110.19,317.41)	3824.77(2574.85,5365.97)	3.05(1.71,4.54)	59.88(40.61,83.52)	-0.59(-0.82,-0.37)	-0.88(-1.14,-0.61)
Egypt	9907.91(6764.53,14098.15)	243839.87(179802.33,332337.70)	52.77(28.54,82.63)	987.40(649.85,1419.28)	18826.63(13393.95,25036.16)	462209.21(351183.19,602730.54)	42.72(25.00,60.52)	806.63(564.79,1086.13)	-0.33(-0.50,-0.16)	-0.43(-0.58,-0.29)
Ecuador	478.05(322.58,651.53)	11226.79(8808.19,13944.43)	10.20(5.92,14.45)	207.77(154.75,266.87)	1050.61(555.77,1592.81)	20046.28(13454.73,28553.09)	7.32(3.52,11.22)	128.42(82.05,185.69)	0.41(-0.48,1.30)	-0.12(-1.05,0.82)
Dominican Republic	260.48(182.52,361.95)	7025.09(5367.34,9206.65)	7.89(4.96,11.57)	180.87(132.97,245.52)	872.14(529.61,1282.13)	21128.69(14641.32,29318.44)	8.89(5.34,13.28)	207.60(142.35,288.03)	0.94(0.72,1.16)	0.92(0.75,1.10)
Dominica	17.59(11.39,23.63)	351.26(255.66,440.76)	30.71(18.93,41.73)	603.83(431.62,764.14)	24.05(15.43,32.77)	503.37(363.84,671.37)	30.76(18.20,42.31)	611.43(437.42,811.42)	0.14(-0.03,0.31)	0.24(0.03,0.44)
Djibouti	13.11(7.96,19.89)	393.58(236.48,597.03)	12.14(7.01,19.40)	265.61(162.94,405.27)	54.91(32.80,88.55)	1577.77(979.62,2469.58)	11.28(5.89,19.64)	237.15(141.92,378.77)	-0.45(-0.53,-0.37)	-0.60(-0.68,-0.51)
Denmark	96.92(51.75,142.21)	1654.49(1109.93,2230.27)	1.12(0.61,1.62)	20.03(14.08,26.41)	141.93(54.36,224.25)	2077.92(1148.80,2953.25)	1.02(0.42,1.58)	16.45(10.14,22.48)	-0.27(-0.58,0.04)	-0.65(-0.91,-0.39)
Democratic Republic of the Congo	1962.57(857.81,3121.27)	53144.77(23562.48,86057.22)	15.15(6.72,24.07)	336.79(147.90,529.69)	7561.81(4059.45,11812.30)	193107.45(106134.57,304850.76)	27.04(13.58,43.96)	551.64(301.35,855.44)	1.92(1.84,1.99)	1.62(1.55,1.69)
Democratic People's Republic of Korea	763.02(407.21,1246.65)	16712.42(9433.06,26523.52)	6.67(3.09,11.57)	119.56(65.15,194.38)	2876.55(1593.05,4572.59)	53922.08(34411.04,81005.93)	10.34(5.43,17.02)	177.24(109.72,267.15)	1.65(1.53,1.77)	1.46(1.36,1.56)
Czechia	297.76(213.41,379.72)	6706.26(5372.60,8002.08)	2.21(1.56,2.83)	49.72(39.72,59.43)	1302.32(688.60,1868.49)	21180.39(13511.08,28223.00)	5.58(2.98,7.97)	95.73(64.02,125.74)	2.81(1.91,3.72)	1.93(1.13,2.74)
Cyprus	50.73(20.23,93.88)	861.71(404.76,1410.38)	10.91(3.11,22.10)	148.04(57.98,277.17)	101.41(40.94,162.12)	1461.21(836.83,2148.36)	7.20(2.32,11.94)	89.31(42.91,135.43)	-1.45(-1.82,-1.09)	-1.76(-2.03,-1.49)
Cuba	243.52(183.86,314.87)	6408.72(5266.17,7661.78)	2.46(1.82,3.23)	62.73(51.24,75.25)	1616.73(1002.42,2254.47)	32206.55(23774.52,40642.06)	7.84(5.06,10.72)	165.76(125.45,207.12)	4.32(4.11,4.53)	3.65(3.46,3.84)
Croatia	745.38(404.18,1080.40)	13129.50(8981.43,17450.00)	14.68(7.53,21.74)	239.15(157.29,327.96)	752.42(338.87,1103.38)	11106.47(6715.84,15327.83)	7.74(3.74,11.21)	121.21(77.57,162.83)	-1.06(-1.52,-0.58)	-1.35(-1.80,-0.90)
Côte d'Ivoire	385.84(209.59,551.32)	11948.35(6871.79,17030.61)	11.11(5.77,16.35)	263.42(146.90,380.78)	1534.34(856.67,2217.15)	46069.75(25947.98,66259.12)	15.38(8.21,22.68)	360.60(204.47,520.59)	1.06(0.80,1.32)	1.03(0.77,1.28)
Costa Rica	91.00(58.65,125.47)	1932.58(1470.22,2405.83)	5.57(3.43,7.80)	111.47(82.76,141.78)	285.39(146.84,410.81)	5078.33(3446.33,6601.00)	4.99(2.63,7.12)	91.11(62.22,118.03)	-1.41(-1.87,-0.94)	-1.66(-2.04,-1.29)
Cook Islands	7.28(5.36,9.50)	199.45(150.65,251.84)	62.96(44.14,83.76)	1515.14(1136.80,1925.02)	9.19(6.30,12.20)	213.50(160.80,276.00)	36.45(24.19,48.43)	858.60(639.22,1119.65)	-1.78(-1.89,-1.68)	-1.79(-1.91,-1.66)
Congo	255.17(116.42,396.58)	7133.09(3332.19,11160.57)	27.03(12.64,43.42)	641.02(297.12,994.06)	689.37(384.27,1033.26)	18744.81(10494.66,28548.29)	31.50(16.46,49.46)	676.86(383.18,1007.27)	0.24(0.11,0.37)	-0.12(-0.28,0.04)
Comoros	28.30(13.28,44.69)	775.59(360.69,1259.93)	17.34(7.81,27.37)	382.23(182.03,603.73)	73.75(39.73,118.21)	1802.70(1043.43,2744.34)	17.80(8.76,29.31)	369.91(208.35,574.37)	-0.14(-0.34,0.06)	-0.39(-0.61,-0.16)
Colombia	1863.79(1274.28,2480.42)	41200.44(32172.61,50434.97)	12.36(7.68,17.27)	243.14(177.22,308.23)	2275.91(1171.65,3344.68)	40958.75(27362.69,55516.45)	3.98(2.09,5.81)	73.42(49.29,99.00)	-4.08(-4.31,-3.84)	-4.34(-4.61,-4.06)
China	58894.17(33793.57,82599.91)	1393487.86(812664.35,1929010.26)	9.66(4.72,14.65)	182.56(104.75,260.36)	124763.89(63333.52,198270.70)	2373039.87(1485461.40,3462005.03)	6.90(3.14,11.62)	120.03(71.90,180.13)	-1.17(-1.60,-0.73)	-1.46(-1.90,-1.01)
Chile	624.19(389.98,835.61)	12637.50(9536.20,15690.67)	7.07(4.08,9.82)	131.05(93.14,167.23)	1817.10(824.48,2586.42)	29270.12(18811.45,37706.92)	6.87(3.16,9.76)	113.04(73.79,144.73)	0.28(-0.01,0.57)	-0.08(-0.31,0.16)
Chad	269.94(119.90,400.98)	7114.70(3224.96,10323.23)	10.20(4.38,15.69)	247.18(112.72,363.56)	690.29(322.29,1066.31)	19833.59(9756.87,31364.99)	12.97(5.85,20.24)	312.25(151.22,476.80)	0.68(0.43,0.92)	0.64(0.39,0.89)
Central African Republic	176.51(57.66,299.33)	5100.42(1616.35,8955.57)	18.27(6.15,30.77)	424.77(141.46,714.90)	445.89(169.18,750.02)	13092.30(5017.87,22155.85)	24.91(9.44,42.94)	560.91(216.52,923.31)	0.97(0.90,1.03)	0.85(0.79,0.91)
Canada	319.90(189.95,439.19)	7123.67(5438.90,8793.91)	1.01(0.59,1.41)	22.46(17.28,27.82)	1261.56(670.60,1736.50)	26238.10(19263.57,32745.65)	1.66(0.99,2.19)	40.78(32.40,48.52)	1.97(1.55,2.39)	2.38(1.98,2.79)
Cameroon	670.23(341.21,951.67)	18907.77(10056.35,25996.90)	16.73(8.05,24.42)	399.08(207.46,557.69)	2032.02(949.93,3077.61)	58225.38(28234.46,87725.04)	18.44(8.55,28.66)	422.29(204.91,637.60)	0.27(0.07,0.47)	0.14(-0.08,0.35)
Cambodia	318.56(148.63,502.32)	9228.03(4273.47,14475.96)	7.47(3.38,11.98)	189.06(89.07,298.81)	854.28(444.04,1281.50)	23262.09(12537.83,34221.81)	7.53(3.89,11.72)	178.51(95.73,265.98)	0.00(-0.16,0.16)	-0.22(-0.36,-0.08)
Cabo Verde	21.58(12.84,32.28)	522.71(344.79,736.18)	9.45(5.76,13.94)	237.73(157.89,333.77)	44.95(28.09,64.39)	1064.27(772.44,1426.51)	10.48(6.42,15.04)	231.29(166.60,312.19)	0.09(-0.22,0.40)	-0.32(-0.57,-0.08)
Burundi	218.25(17.56,379.02)	5751.13(556.37,10005.70)	10.72(0.93,19.09)	241.56(23.78,415.99)	377.67(178.71,567.39)	10425.18(5171.97,15226.18)	9.53(4.43,15.62)	204.86(100.92,302.88)	-0.89(-1.10,-0.67)	-1.06(-1.29,-0.83)
Burkina Faso	288.42(167.12,431.01)	8468.13(5071.08,12581.89)	7.06(3.98,11.01)	181.65(106.43,271.50)	869.17(455.90,1391.34)	24697.64(13078.76,38619.97)	10.01(5.18,16.63)	243.06(128.27,382.08)	1.38(1.27,1.48)	1.13(1.04,1.22)
Bulgaria	2157.41(1605.99,2775.90)	49421.91(39525.89,60557.78)	21.51(13.33,29.43)	429.90(324.17,535.84)	8511.24(4944.69,11903.85)	149847.56(105423.26,194683.90)	59.71(34.53,83.60)	1083.92(779.93,1396.41)	4.28(3.46,5.10)	3.84(3.07,4.60)
Brunei Darussalam	4.68(2.98,6.62)	135.12(92.91,178.19)	5.30(2.90,8.32)	110.82(73.20,154.36)	12.03(8.50,16.87)	347.63(264.09,471.54)	4.58(2.53,6.96)	94.64(65.00,131.26)	-0.12(-0.35,0.12)	-0.35(-0.55,-0.15)
Brazil	8247.89(6241.63,10305.36)	213068.17(175781.03,252164.66)	10.41(7.07,13.84)	232.92(184.52,283.37)	16585.67(10636.69,21884.77)	355514.68(277792.23,428607.16)	6.83(4.26,9.14)	142.20(109.04,173.05)	-1.20(-1.36,-1.05)	-1.54(-1.69,-1.40)
Botswana	106.24(67.97,157.11)	2780.15(1821.36,4071.82)	23.62(14.36,38.48)	504.37(327.36,749.41)	288.55(195.98,406.06)	7020.32(4903.25,10010.15)	25.32(14.94,36.56)	497.27(340.74,698.25)	0.61(0.28,0.94)	0.29(-0.04,0.62)
Bosnia and Herzegovina	234.19(154.12,338.30)	5342.00(3848.68,7327.49)	6.75(4.27,10.19)	137.32(95.47,194.10)	492.84(246.63,775.25)	8367.61(5117.15,12214.52)	7.73(3.94,12.11)	132.67(81.87,192.99)	0.69(0.50,0.88)	0.09(-0.10,0.28)
Bolivia (Plurinational State of)	205.05(84.34,321.16)	5183.75(2280.31,7817.94)	7.50(2.98,12.02)	160.07(68.94,244.42)	562.87(278.21,865.12)	12771.55(7209.60,19099.66)	7.32(3.35,11.52)	144.71(79.27,216.13)	-0.03(-0.07,0.01)	-0.36(-0.40,-0.32)
Bhutan	15.13(7.07,23.57)	418.54(203.41,631.92)	7.33(3.30,12.18)	166.95(78.95,258.70)	37.93(22.36,58.03)	838.44(538.48,1221.29)	6.78(3.89,10.56)	139.12(88.89,204.39)	-0.28(-0.34,-0.22)	-0.66(-0.70,-0.62)
Bermuda	2.96(1.98,3.88)	64.82(49.61,80.13)	5.15(3.20,6.98)	105.37(79.24,132.91)	7.93(4.25,11.22)	143.09(96.78,188.68)	5.26(3.00,7.30)	104.76(75.09,134.87)	0.47(-0.11,1.04)	0.40(-0.18,0.97)
Benin	170.84(98.44,242.71)	4717.43(2818.34,6552.75)	8.95(5.15,13.14)	225.10(133.59,314.81)	516.09(293.73,733.12)	14811.74(8804.36,21058.13)	10.78(6.06,15.67)	258.90(152.65,365.51)	0.61(0.49,0.73)	0.44(0.31,0.56)
Belize	9.08(6.42,11.66)	215.77(173.62,259.71)	9.82(6.85,12.66)	225.90(180.00,273.85)	44.68(31.63,57.32)	1105.54(915.98,1326.06)	16.13(10.59,21.24)	356.34(277.77,439.27)	2.11(1.83,2.39)	1.92(1.66,2.18)
Belgium	173.91(79.64,270.71)	2740.82(1602.55,3876.28)	1.14(0.50,1.79)	17.94(10.72,25.17)	338.55(114.82,546.84)	4377.31(2078.47,6473.64)	1.05(0.44,1.64)	15.90(9.08,21.91)	-0.36(-0.98,0.26)	-0.43(-0.92,0.07)
Belarus	328.59(233.84,438.20)	8400.05(6171.54,10906.63)	2.55(1.79,3.40)	64.62(48.15,82.59)	108.61(72.90,144.79)	2557.84(1968.51,3288.16)	0.69(0.48,0.91)	16.97(13.09,21.78)	-5.33(-6.50,-4.15)	-5.40(-6.59,-4.19)
Barbados	25.92(15.75,35.94)	510.15(369.39,649.85)	8.77(5.43,12.06)	181.40(136.37,226.03)	50.07(28.83,71.45)	990.53(712.07,1327.26)	9.71(5.54,13.91)	196.58(141.24,263.64)	0.91(0.75,1.08)	0.82(0.66,0.98)
Bangladesh	1406.96(807.30,2288.87)	35524.56(20846.10,54108.32)	3.38(1.84,5.75)	73.92(42.80,113.70)	5593.56(2923.86,10799.38)	130349.06(75491.13,257674.63)	4.68(2.25,9.36)	96.18(53.84,183.83)	1.21(0.96,1.46)	1.17(0.97,1.37)
Bahrain	19.17(13.73,25.10)	491.37(369.76,624.61)	18.32(9.90,26.57)	326.77(217.89,440.03)	68.62(45.14,97.86)	1705.54(1207.78,2365.79)	15.32(7.41,23.37)	249.19(149.96,358.19)	-0.80(-1.10,-0.50)	-1.24(-1.44,-1.04)
Bahamas	41.78(31.49,51.90)	1122.47(917.70,1330.00)	28.12(20.15,36.02)	680.09(540.23,820.54)	140.81(100.63,184.58)	3568.05(2700.59,4475.53)	37.10(24.71,50.31)	851.26(632.91,1078.31)	1.12(0.86,1.39)	0.98(0.76,1.20)
Azerbaijan	587.31(379.72,838.69)	13915.95(9705.80,18930.30)	13.71(8.19,20.51)	286.27(193.48,395.45)	959.00(610.56,1433.67)	22172.83(14660.53,32322.51)	11.47(6.75,17.63)	228.30(147.87,332.85)	-0.21(-0.45,0.03)	-0.55(-0.82,-0.28)
Austria	566.80(277.32,826.77)	9464.64(5951.69,12649.94)	4.65(2.32,6.75)	79.21(52.20,104.29)	1372.13(431.07,2209.96)	17158.84(7300.55,25909.46)	5.65(2.05,8.88)	78.65(40.80,113.33)	1.59(1.21,1.98)	0.80(0.47,1.13)
Australia	279.27(154.05,404.51)	5140.07(3610.53,6736.78)	1.55(0.78,2.29)	27.30(18.79,36.45)	728.21(284.90,1068.73)	11620.86(7093.09,15465.92)	1.36(0.62,1.95)	24.76(16.42,31.56)	-0.10(-0.53,0.33)	-0.05(-0.50,0.40)
Armenia	221.12(136.06,309.01)	4511.12(3256.72,5858.57)	9.73(5.62,13.97)	180.01(127.01,237.40)	356.80(187.39,514.65)	6286.21(4068.22,8708.55)	8.28(4.51,11.85)	145.55(95.58,201.08)	-0.27(-0.65,0.12)	-0.34(-0.66,-0.02)
Argentina	2700.78(1778.56,3528.97)	55802.30(43117.49,68642.90)	8.97(5.51,12.09)	176.22(132.80,220.16)	4862.98(2451.57,6898.62)	79771.39(53240.29,103843.16)	8.31(4.25,11.72)	139.87(95.04,180.37)	0.16(-0.02,0.34)	-0.44(-0.61,-0.27)
Antigua and Barbuda	8.86(5.52,12.26)	184.58(138.63,235.21)	15.96(10.32,21.71)	350.21(272.03,435.79)	23.39(16.30,30.31)	508.52(404.63,612.92)	24.66(15.05,33.16)	486.53(370.60,600.67)	1.76(1.29,2.24)	1.46(0.98,1.94)
Angola	649.82(339.62,967.28)	18801.53(9617.17,28056.16)	19.45(10.10,29.51)	453.90(244.09,676.16)	2099.34(1288.38,3056.63)	57503.06(36082.38,83904.13)	22.51(13.29,35.02)	480.53(299.48,700.29)	0.19(0.07,0.31)	-0.08(-0.19,0.02)
Andorra	2.18(1.02,3.60)	39.92(23.52,60.79)	5.14(2.01,8.60)	79.97(42.73,125.59)	6.76(2.29,11.93)	92.14(44.53,151.02)	3.59(1.35,6.25)	53.72(28.77,87.03)	-0.74(-0.93,-0.54)	-0.90(-1.09,-0.71)
American Samoa	2.32(1.66,2.92)	70.18(50.94,87.41)	11.23(7.39,15.15)	278.83(198.62,349.45)	4.01(3.03,5.13)	111.20(86.24,141.14)	8.89(6.26,11.59)	219.90(168.73,278.56)	-0.98(-1.26,-0.70)	-1.00(-1.28,-0.72)
Algeria	2237.43(1375.08,3318.47)	53557.44(34555.70,79683.63)	25.95(12.71,42.50)	482.37(289.02,728.78)	7083.97(3893.75,10625.74)	145615.51(89971.19,210695.50)	27.42(12.35,42.80)	459.09(268.54,676.13)	0.57(0.41,0.74)	0.08(-0.05,0.20)
Albania	124.54(71.20,188.80)	2391.94(1521.42,3435.51)	7.50(3.95,11.64)	129.10(79.12,189.37)	236.57(105.54,398.09)	3921.05(2159.88,6239.47)	5.79(2.45,9.91)	92.36(49.77,146.75)	-0.42(-0.67,-0.17)	-0.65(-0.89,-0.41)
Afghanistan	2338.50(867.80,3961.77)	61150.83(21259.22,104982.29)	36.97(14.60,61.15)	865.66(315.13,1466.02)	2995.13(1427.50,4803.28)	83305.43(38781.64,135678.17)	36.60(17.84,58.05)	802.84(387.04,1302.15)	-0.12(-0.25,0.00)	-0.37(-0.51,-0.23)
ASMR,age-standardized mortality rates;ASDR,age-standardized DALY rates; DALYs, disability-adjusted life years; UI, uncertainty interval; CI, confidence Interval; EAPC, estimated annual percentage change.
